1

2

## Dynamic Modeling and Stochastic Simulation of Metabolic Networks

3

4 Emalie J. Clement<sup>1</sup>, Ghada A. Soliman<sup>2</sup>, Beata J. Wysocki<sup>1</sup>, Paul H. Davis<sup>1</sup>, Tadeusz A. Wysocki<sup>3,4</sup>.

5

6 <sup>1</sup>Department of Biology, University of Nebraska at Omaha, Omaha, Nebraska, USA.

7 <sup>2</sup>Graduate School of Public Health and Health Policy, City University of New York, New York, USA.

8 <sup>3</sup>Department of Electrical and Computer Engineering, University of Nebraska – Lincoln, Omaha, Nebraska,  
9 USA.

10 <sup>4</sup>UTP University, Bygoszcz, Poland.

11

12 \*Corresponding author

13 Email: [pdavis@unomaha.edu](mailto:pdavis@unomaha.edu) (PHD)

14

15 All authors contributed equally to this work.

## 16 **Abstract**

17           Increased technological methods have enabled the investigation of biology at nanoscale levels.  
18   Nevertheless, such systems necessitate the use of computational methods to comprehend the complex  
19   interactions occurring. Traditionally, dynamics of metabolic systems are described by ordinary differential  
20   equations producing a deterministic result which neglects the intrinsic heterogeneity of biological systems.  
21   More recently, stochastic modeling approaches have gained popularity with the capacity to provide more  
22   realistic outcomes. Yet, solving stochastic algorithms tend to be computationally intensive processes.  
23   Employing the queueing theory, an approach commonly used to evaluate telecommunication networks,  
24   reduces the computational power required to generate simulated results, while simultaneously reducing  
25   expansion of errors inherent to classical deterministic approaches. Herein, we present the application of  
26   queueing theory to efficiently simulate stochastic metabolic networks. For the current model, we utilize  
27   glycolysis to demonstrate the power of the proposed modeling methods, and we describe simulation and  
28   pharmacological inhibition in glycolysis to further exemplify modeling capabilities.

## 30 **Author Summary**

31           Computational biology is increasingly used to understand biological occurrences and complex  
32   dynamics. Biological modeling, in general, aims to represent a biological system with computational  
33   approaches, as realistically and accurate as current methods allow. Metabolomics and metabolic systems  
34   have emerged as an important aspect of cellular biology, allowing a more sensitive view for understanding  
35   the complex interactions occurring intracellularly as a result of normal or perturbed (or diseased) states. To  
36   understand metabolic changes, many researchers have commonly used Ordinary Differential Equations to  
37   produce *in silico* models of the *in vitro* system of interest. While these have been beneficial to date,  
38   continuing to advance computational methods of analyzing such systems is of interest. Stochastic models  
39   that include randomness have been known to produce more realistic results, yet the difficulty and intensive  
40   time component urges additional methods and techniques to be developed. In the present research, we

41 propose using queueing networks as a technique to model complex metabolic systems, doing such with a  
42 model of glycolysis, a core metabolic pathway.

43

## 44 **Introduction**

45 Cellular metabolism is an extensively complex network of enzymes, metabolites and other  
46 biomolecules required to both maintain homeostasis and appropriately react to stimuli. Biochemists began  
47 examining cell metabolism in the mid-19th century, and with our advancement in both experimental  
48 techniques and computational capacity, increasing comprehension of metabolic intricacies has been  
49 realized. As a relatively new field, metabolomics studies are concerned with the detection and  
50 quantification of metabolites. When considering the complexity of the metabolome, the analytical side of  
51 metabolomics and metabolism can easily become daunting. The KEGG Compound database currently  
52 contains 18,047 metabolites and other small molecules, making the intuitive aspect of understanding  
53 metabolite dynamics nearly inconceivable [1]. Thus, computational modeling reconstruction and simulation  
54 of metabolic systems have become pivotal in the analysis and surveillance of such systems.

55 Within the last decade, it has been a considerable goal to develop mathematical models of  
56 biological systems that accurately predict cellular and ultimately systems level behavior, providing  
57 quantitative details and prediction of phenotypic changes resulting from perturbation. Models as a whole  
58 are a representation of reality, aiming to accurately represent the system of study. Inclusion of all cellular  
59 components indirectly or directly involved are considered far too complex to model. Consequently,  
60 simplifications and assumptions must be made and often the perceived non-pivotal details, such as  
61 stochasticity, omitted. Nevertheless, the accuracy and competence of the model is dependent on these  
62 assumptions and simplifications.

63 Many approaches may be taken to model the dynamics of metabolic systems; importantly, the  
64 categorization of deterministic and stochastic modeling approaches. Most often, kinetic models of  
65 metabolism have been modeled using ordinary differential equations (ODE) providing a deterministic

66 modeling approach that gives quantitative information on the interactions, underlying dynamics, and  
67 regulation of the components of the system [2]. ODE models operate with the assumption that all reactions  
68 occur under evenly mixed, homogenous populations with many molecules in the environment. From early  
69 on, ODEs have been used to simulate biochemical kinetics and biochemical networks. This approach, with  
70 historically “limited” computational power, was sufficient to describe the interactions and dynamics  
71 occurring within biochemical networks. Rapoport et al. describes the ability to determine metabolite  
72 concentrations of glycolytic intermediates in erythrocytes by a desktop calculator [3]. In our current time,  
73 with the aid of increasing computational power, metabolite concentrations within an enzymatic chain of  
74 reactions can be determined almost instantly. There are numerous methods and well defined strategies for  
75 solving ODEs; the prevalence and significance in both biochemical simulations in addition to mathematics  
76 offer a firm grasp on dealing with simple systems of ordinary differential equations. While ODE modeling  
77 reduces computational efforts, the assumptions and simplifications come at the cost of omitting noise and  
78 randomization that is inherent in biological systems. Thus, stochastic modeling approaches may be a more  
79 realistic representation of *in vitro* and *in vivo* systems [2].

80         Though ODE methods have been well defined in biological community, more recently, systems  
81 biology has begun to extend the limits of what has previously been capable computationally; modeling the  
82 complexities of biological variation - the stochastic effects inherent in biology. Stochastic models are  
83 typically formulated by the chemical master equation (CME), and have the ability to capture the stochastic  
84 occurrences common in biological systems. Yet, the drawback comes with the increased mathematical and  
85 computational complexity, additionally limiting the size of the network. The CME is a continuous Markov  
86 process that has commonly been handled by way of Monte-Carlo simulations, wherein the probability of a  
87 particular reaction occurring is calculated and the probability of the particular reaction occurring in a given  
88 time interval is also calculated and updated given the state of the system [4]. Needless to say, the  
89 complexity of even a small system becomes unmanageable. Not to mention the increase in the number of  
90 parameters required and whether or not the specific parameters are appropriate given the context in which

91 they are derived [5]. The Gillespie algorithm, introduced in 1977, provides exact simulation methods and  
92 can be sped up with the implementation of Tau leaps [4,6,7]. Still, attempts are being made to improve  
93 stochastic simulation, and overcome the difficulties involved [2,5,8–13].

94 One relatively new approach to understanding and modeling complex biological networks is the  
95 application of queueing networks. Having some similarities to the Gillespie algorithm, queueing networks  
96 can be represented as a Markov chain, being more convenient to use than directly implementing the  
97 Gillespie algorithm [14]. Queueing networks have previously been used to describe data communication  
98 networks [15], servicing of patients at hospitals [16], the HIV infection process [17], pharmacokinetic  
99 modeling [18], and non-viral gene delivery [19]. Moreover, the implementation as described by Martin et  
100 al. [19], has accounted for other cell processes, like mitosis or cell necrosis, which are not easy to  
101 implement in the ODE approach. Queueing networks have also been used to develop a simple model of  
102 metabolism [20] and enzyme substrate interactions [21]. Briefly, queueing theory is a method of  
103 approaching stochastic simulations, doing so in such a way that computationally, it is less intensive and  
104 accordingly, possesses the ability to potentially describe larger networks - large networks that may not be  
105 able to be simulated in a reasonable amount of time given other stochastic simulation methods.

106 Recently, we have developed a tool to recapitulate observed *in vitro* insulin responses, plus measure  
107 the effects of Wortmannin-like inhibition on glucose uptake [22]. This has provided insight into transient  
108 changes in molecule concentrations throughout the insulin signaling pathway, and opened the door to  
109 identify critical, drug-targetable components of this pathway, including those associated with insulin  
110 resistance. Notably, our model was capable of calculating all network components of 100 averaged cells at  
111 near real-time: approximately 12 minutes on a desktop computer to produce 10 minutes of simulated data.  
112 Comparatively, the classical ODE approach of this complex network was calculated to take more than 80  
113 days for completion. More importantly, though, the classical approach fails to take into account random  
114 variation naturally occurring within cells and tissues [23]. Conversely, the application of queueing theory  
115 has recently provided the ability to overcome computational intensity and incorporate a natural variation of

116 kinetic constants and initial molecular concentrations. Herein, we present the current model using queueing  
117 theory to simulate the stochastic effects of glucose metabolism as a simplified technique to model  
118 metabolism, specifically glucose metabolism. For model validation, we provide qualitative comparisons of  
119 pharmacological inhibition in both simulated conditions and experimental metabolic data from cancer cells.

120

## 121 **Methods**

122 The model presented uses ODE's and glucose metabolism as a platform to describe the dynamical  
123 behavior of the pathway. Glucose metabolism has been described with ODEs in many modeling efforts.  
124 Being well defined both computationally and biochemically, researchers often model glycolysis and  
125 glucose metabolism when developing novel simulation methods. With a predetermined notion of the  
126 outcome, one can more easily compare results and begin validating the computational methods being  
127 developed. Consequently, we have used glycolysis to present queueing theory modeling of metabolic  
128 networks. A brief overview of glycolysis and glucose metabolism can be found in [24].

129 For the initial development of the model, we made use of previously derived mechanistic equations  
130 employing Michaelis-Menten kinetics. The mathematical analysis of the rate equations and parameters used  
131 are described in Mulukutla et al [25]. The derivation of the rate equations can be found in Mulquiney et al. .  
132 Our aim was to use a previously defined model to implement our proposed queueing theory approach, thus  
133 the parameters and kinetic constants for the current model were chosen to reflect the model investigated in  
134 Mulukutla et al. Notably, Mulquiney et al. report experimental and observed initial metabolite  
135 concentrations which were used for the current model. Concentration and parameter values that were either  
136 absent or substantially different between sources were obtained through additional literature searches .  
137 Furthermore, energy nucleotides and metal ions were fixed in our model for simplification and to centralize  
138 the model around the intermediate metabolites of glycolysis. Table 1 lists the initial concentrations of the  
139 metabolites measured in the simulation output, while Table 2 provides concentrations of additional  
140 substrates that were required for calculations, but not directly measured throughout the simulation.

141 To demonstrate the mechanics of how queueing networks are applied to modeling metabolic  
142 pathways, one can consider a pathway of  $N$  interacting metabolites  $M_1, \dots, M_N$  having initial concentrations  
143 at time instant  $t_0$  of  $C_1(t_0), \dots, C_N(t_0)$ . Within the considered metabolic pathway, each of the metabolites  $M_1,$   
144  $\dots, M_N$  is involved in  $K_i$  reactions,  $i = 1, \dots, N$ . The corresponding reaction rates  $v_{i,j}(C_1(t), \dots, C_N(t), t); i =$   
145  $1, \dots, N; j = 1, \dots, K_i$ , usually depend on the instantaneous concentrations of the interacting metabolites at  
146 time  $t$ , as well as other metabolites/enzymes, which given the time variability of those, is denoted as  
147 additional time dependability of  $t$ . The reaction rates can be positive or negative, with metabolites being  
148 produced for the positive sign and absorbed if the sign is negative. To find the concentration of the  
149 particular metabolite,  $C_i(t)$  at given time instant  $t$ , one normally needs to solve a set of ODEs of the form:

150  
151 (1)

152 
$$\frac{d}{dt}C_1(t) = \sum_{j=1}^{K_1} v_{1,j}(C_1(t), \dots, C_N(t), t)$$

153  
154 
$$\frac{d}{dt}C_2(t) = \sum_{j=1}^{K_2} v_{2,j}(C_1(t), \dots, C_N(t), t)$$

155 
$$\dots$$

156 
$$\frac{d}{dt}C_N(t) = \sum_{j=1}^{K_N} v_{N,j}(C_1(t), \dots, C_N(t), t)$$

157  
158 with the initial condition  $C_1(t_0), \dots, C_N(t_0)$ .

159 Given the interdependency of the concentrations  $C_1(t_0), \dots, C_N(t_0)$ , which is usually highly non-  
160 linear, and further dependency of other time varying and/or random factors, achieving the solution of such  
161 sets of equations is not only extremely computationally intensive, but also not guaranteed to produce a  
162 numerically stable result. The problem is further complicated by the fact that the concentrations  $C_1(t), \dots,$   
163  $C_N(t)$  are always non-negative, and as reported by Infante et al [30], and Erbe et al.[31], this is a non-trivial  
164 task or such a solution may not even exist. One can force the numerical solver to produce the non-negative

165 solution, for example by using MATLAB's 'NonNegative' option is in the 'odeset' solver [32]. However,  
166 this significantly increases the computation time, and the solution may not be accurate or numerically  
167 stable. This might be especially problematic for those metabolites that are not expressed in high  
168 concentrations and/or are very rapidly used in other reactions, for example, the metabolite glucose-6-  
169 phosphate (G6P) is also an intermediate in the Pentose Phosphate Pathway (PPP) and glycogen metabolism  
170 [33].

171 To find a method to simulate processes described by the set of ODEs (1), one can notice that each  
172 of the ODEs in (1) is of the form describing an average behavior of an  $M(t)/M(t)/c$  non-depleting queue  
173 [14]. In general, the  $M(t)/M(t)/c$  queue is such a system where arrivals form a single queue and are  
174 governed by a time varying Poisson process, there are  $c$  servers and job service times are exponentially  
175 distributed with time varying rates. The  $M(t)/M(t)/c$  non-depleting queues are special cases of queues [16]  
176 where for each time interval, the difference between corresponding arrival rate and service rate is non-  
177 negative. Massey et al [14] also analyzed a general case of  $M(t)/M(t)/c$  queues, for which there is no simple  
178 method to describe them by means of ODEs, but which can be depleted to zero elements in the queue or in  
179 other words for queues that can be completely emptied.

180 Hence, the  $M(t)/M(t)/c$  queues can be used to model metabolic pathways for simulation purposes,  
181 and instead of solving a set of ODEs (1), simulate a network of interconnected  $M(t)/M(t)/c$  queues,  
182 provided that the concentrations  $C_1(t), \dots, C_M(t)$  are digitized. The arrival rates are for the queues and the  
183 service rates are the reaction rates  $v_{i,j}(C_1(t), \dots, C_M(t), t)$  normalized to the duration of a single simulation  
184 time step  $\Delta t_i$  and the concentration increment  $\Delta(C_i(t))$ , which denotes a finite change of  $C_i(t)$  in time  
185 increment of  $\Delta t_i$ . The normalization is done according to the formula:

186 (2)

187 
$$\mu_{i,j} = \frac{v_{i,j}(C_1(t), \dots, C_M(t), t)\Delta t_i}{\Delta(C_i(t))}$$

188



189 If the normalized rate  $\mu_{i,j}$  is positive, it is an arrival rate while if it is negative it is a service rate. The  
190 instantaneous length of each queue provides a possible realization of a stochastic Markovian process  
191 representing variations of concentration of the given metabolite. Of course, the average changes in  
192 concentration can be achieved by averaging the simulation results for several simulation runs. To ensure  
193 correctness of simulation, the simulation time step  $\Delta t_i$  and the concentration increment  $\Delta(C_i(t))$ , have to  
194 be chosen in such a way that all  $\mu_{i,j}$  are lower than 1, as the arrival and service rates represent the  
195 probabilities of arrival and service of  $\Delta(C_i(t))$  in the given time interval. It should be noted that for  
196 ensuring that just a single  $\Delta(C_i(t))$  is processed in each time interval the conditions are as follows:

197 (3)

$$\begin{aligned} 198 \quad & \mu_{i,j} \ll 1, \\ 199 \quad & \text{for } j = 1, \dots, K_i \text{ and } i = 1, \dots, N \end{aligned}$$

200

201 However, neither the simulation time step  $\Delta t_i$  nor the concentration increment  $\Delta(C_i(t))$ , do not  
202 need to be the same for all  $i = 1, \dots, N$ , but can be chosen in a way that minimizes the simulation time, while  
203 ensuring that the condition (3) is satisfied. Though the time increment can be calculated dynamically within  
204 each step, for the current model we have chosen a constant time increment to speed up simulation time.  
205 Given the stochastic nature of chemical reactions, where the reaction rates can vary depending on  
206 environmental conditions, the reaction rates can be randomized by adding the Gaussian (or other) noise to  
207 the kinetic constants used to calculate values of  $v_{i,j}(C_1(t), \dots, C_N(t), t)$ . The same can be performed for the  
208 initial concentrations at time instant  $t_0$  of  $C_1(t_0), \dots, C_N(t_0)$ .

209 A queue representing concentration of a single metabolite is shown in Fig 1, where the inputs to the  
210 represent reactions leading to production of the metabolite and outputs represent reactions using this  
211 metabolite. The cloud connected to the queue via bi-directional arrow represents processes not considered  
212 (or not even currently discovered) that result in an imbalance between an aggregated input to- and an  
213 aggregated output from the queue. The arrivals to the queue, representing discrete increments in

214 concentration of the metabolite are modeled as Poisson processes, while the service time (time intervals  
 215 between two consecutive output events) is modeled by an exponential distribution. Assuming that in total  
 216 there are  $c$ -outputs from the queue, the queue can be considered as a standard  $M(t)/M(t)/c$  queue, as  
 217 described before.

218 **Fig 1. Example Queue.**

219 Queue representing concentration  $C_i(t)$  of the metabolite  $M_i$ ;  $\mu_{i,j}$ ,  $j = 1, \dots, L_i$ , are arrival rates as  
 220 corresponding to processes resulting in production of metabolite  $M_i$ ;  $\mu_{i,j}$ ,  $j = L_i + 1, L_i + 2, \dots, K_i^*$ , are  
 221 service rates corresponding to processes using metabolite  $M_i$ .  $K_i^*$  = number of reactions considered in the  
 222 model metabolite  $M_i$  is involved in.

223 For the description to be valid, the sums of all arrival rates,  $\mu_{i,j}$ ,  $j = 1, \dots, L_i$ , and the sum of all  
 224 service rates  $\mu_{i,j}$ ,  $j = L_i + 1, L_i + 2, \dots, K_i^*$  must each be lower than 1. A fulfilment of this condition can be  
 225 satisfied by either reducing the duration of time increment or increasing the concentration unit. Of course,  
 226 reducing the time increment increases the simulation time, as more simulation steps must be considered for  
 227 the duration of an experiment, while increasing the concentration unit may reduce the accuracy of the  
 228 simulation results. Therefore, a careful balance must be struck while choosing those parameters.

229 Furthermore, from the perspective of implementing simulation of the metabolic process, it is convenient to  
 230 ensure that in a given simulation step only one concentration unit of a given metabolite  $M_i$  is going to be  
 231 processed. Assuming that there are  $J_i = K_i^* - L_i$  possible reactions that can be utilizing metabolite  $M_i$ , the  
 232 probability  $P_{i1}$  that this happens is given by the formula:

233 (4)

234 
$$P_{i1} = \sum_{j=1}^{J_i} \mu_{i,j} \prod_{\substack{k=1 \\ k \neq j}}^{J_i} (1 - \mu_{i,k})$$

235  
 236 and the conditional probability  $P_{i\{j\}|1}$  that if just one concentration unit is processed in a particular  
 237 simulation step, it is processed in reaction associated with reaction rate  $\mu_{i,j}$ , is given by:

238

(5)

$$P_i\{j|1\} = \frac{\mu_{i,j}}{(1 - \mu_{i,j}) \sum_{k=1}^j \frac{\mu_{i,k}}{1 - \mu_{i,k}}}$$

240

241 It is important to notice here that metabolomics data often include missing or semi-quantitative data,  
242 and some connections between the metabolites might have not been discovered, yet. To account for those  
243 unknown or missing reactions, an additional input/output pathway is included in the model for every  
244 metabolite considered, and shown in Fig 1 as a dashed line connection, which can be bi-directional. The  
245 rate  $\mu_i^*$  is to be determined as the rate balancing the steady state value of the concentration  $C_i(t)$ . If the rate  
246  $\mu_i^*$  is positive, then for a corresponding metabolite concentration different from the steady state value, the  
247 rate is scaled by a factor equal to the ratio of the actual concentration to the concentration at the steady  
248 state. If it is negative, the scaling is inversely proportional. As previously mentioned, we have used  
249 queueing theory to describe additional biological pathways. In such, [34,35] provide further explanations of  
250 the proposed queueing theory methods. Additionally, pseudocode of the queueing theory application has  
251 been provided in the appendix section.

252

## 253 Results

254 For the current study, our interest was in the ability to mechanistically model enzymatic reactions  
255 and stochastically simulate the dynamics of glycolysis utilizing queues. In general, queueing theory is a  
256 mathematical tool used to describe, model and analyze waiting lines, or queues [36]. At cellular level,  
257 metabolites are produced, absorbed, or used by cellular processes, thus forming “queues” of metabolites.  
258 Production or absorption of the metabolite adds to the appropriate queue length, and usage of the  
259 metabolite reduces the queue length. Both production and usage of a given metabolite are described by  
260 discrete random processes, referred to as an arrival and service process, respectively[37]. The queues can  
261 be easily interconnected, and as such are ideally suited to model metabolic networks, the same way as they

262 are used to model the Internet [15]. Our previous work shows the ability to accurately simulate conditions  
263 seen *in vivo* using a fraction of the computing power of classical quantitative approaches at the time [22].  
264 We have adjusted our queuing theory-based approach to model metabolic pathways given mechanistic  
265 rate equations of all glycolytic reactions and validated experimental metabolite data. As a core metabolic  
266 pathway common to all lifeforms, glycolysis is the enzymatic breakdown of glucose into a usable form of  
267 energy, additionally supplying intermediate metabolites as “building blocks” for connecting pathways to  
268 further support life. Naturally, glycolysis provides a scaffold to begin extending our model to incorporate  
269 additional metabolic pathways.

270 For the initial development of the model, we made use of previously derived mechanistic equations  
271 employing Michaelis-Menten kinetics. For the model simulations, all intermediate metabolites were  
272 represented by different queues, as described in the methods section. Additionally, the queues representing  
273 metabolites have been connected if there is a reaction converting one metabolite into another. Fig 2 shows  
274 the assembled queueing network representing glycolysis from glucose to pyruvate; where GLC, glucose;  
275 G6P, glucose 6-phosphate; F6P, fructose 6-phosphate; F16BP, fructose 1,6-bisphosphate; F26BP, fructose  
276 2,6-bisphosphate; GAP glyceraldehyde 3-phosphate; DHAP, dihydroxyacetone phosphate; 13BPG, 1,3-  
277 bisphosphoglycerate; 3PG, 3-phosphoglycerate; 2PG, 2-phosphoglycerate; PEP, phosphoenolpyruvate;  
278 PYR, pyruvate.

279 **Fig 2. Simulated metabolic pathway from glucose to pyruvate.**

280 Arrows denote the modeled reactions.  $V_i$ ,  $i = 0, \dots, 10$ , and  $V3A$ ,  $V3B$ , are the reaction rates; for  
281 bidirectional arrows the direction is determined by the sign of the corresponding reaction rate with the  
282 positive direction being from the top down. GLC, glucose; G6P, glucose 6-phosphate; F6P, fructose 6-  
283 phosphate; F16BP, fructose 1,6-bisphosphate; F26BP, fructose 2,6-bisphosphate; GAP glyceraldehyde 3-  
284 phosphate; DHAP, dihydroxyacetone phosphate; 13BPG, 1,3-bisphosphoglycerate; 3PG, 3-  
285 phosphoglycerate; 2PG, 2-phosphoglycerate; PEP, phosphoenolpyruvate; PYR, pyruvate.

286 For the stochastic simulations presented, the rate equations and model parameters were used as they  
287 are indicated in the literature (Table 1 and Table 2). Highlighting the significance of the approach, the  
288 current methods enabled rapid alteration of parameter adjustment and additional simulations under a variety  
289 of selected *in silico* conditions. Due to the rapid catalytic conversion 3-PG and 2-PG in combination with  
290 the low metabolic concentrations, as separate queues the metabolites 3-PG and 2-PG were readily depleted  
291 given the 1 microsecond time scale used for the metabolite calculations. Thus, 3-PG and 2-PG were  
292 grouped in a single queue avoiding the occurrence of complete deficiency. Furthermore, the summation of  
293 the two consecutive metabolites within a queue slightly decreases total calculations and consequently,  
294 simulation time.

295 As previously noted biochemical reactions, and biological system, in general, are inherently  
296 stochastic processes. Consequently, randomness and variation were incorporated to add additional  
297 stochastic elements to the model simulations. Reaction rates were randomized during simulation by adding  
298 an arbitrarily chosen 10% Gaussian noise to the kinetic constants used to calculate values of  $v_{i,j}(\cdot)$ . The  
299 same was performed for the initial concentrations at time instant  $t_0$  of all glycolytic intermediates. During  
300 the simulations, each simulated cell is calculated independently; that is, concentrations of each molecule in  
301 the metabolic network is stochastic, and bound by error values listed in the literature. The queueing theory  
302 approach causes the actual concentrations of given molecule types to be simulated as separate queues  
303 within each cell. The probability of a movement happening at any time slice from one queue to the next is  
304 determined by the relevant reaction speed. Movements between storages happen at a particular time instant  
305 if a number randomly drawn from the interval  $[0,1]$  at that time instant is smaller than the reaction speed  
306 governing the movement. After simulations have been performed for every considered cell, the results are  
307 averaged over the cell population. Variations of 10% glucose levels are randomly computed for every  
308 simulated second. The simulations were run with a 1 microsecond time step, and random variations in the  
309 values of kinetic constants used in calculating reaction rates were introduced every second. Initial  
310 concentrations were randomized by adding 10% Gaussian noise.

311

## 312 **Glycolytic Flux**

313 Previously, Mulukutla et al. aimed to assess the control of different isoforms of the three rate  
314 limiting glycolytic enzymes on overall pathway flux behavior. The rate limiting enzymes of glycolysis,  
315 hexokinase (HK), phosphofructokinase (PFK), the bifunctional enzyme phosphofructokinase-2/ fructose  
316 2,6-bisphosphatase (PFKFB), and pyruvate kinase (PK) each have multiple isoforms and may be expressed  
317 in combination within single cell in a cell-type dependent manner. We considered regulatory mechanisms  
318 of PFK, PFKFB, and PK by including parameters and terms in the rate equations to consider the feedback  
319 inhibition and activation, keeping both upper and lower glycolytic regulatory loops active in our  
320 simulations. The feedback considered consists of F26BP (an important activator of glycolytic flux) and  
321 F16BP activation of PFK, F16BP activation of PK, and PEP inhibition of PFKFB activity. The parameters  
322 set to simulate the feedback loops are as follows:  $K_{PFKf16bp}=0.65$  mM and  $K_{PKf16bp}=0.04$  mM. The  
323 PFKFB kinase/phosphatase (K/P) ratio, the ratio between the kinase and phosphatase activity, was set to  
324 0.1 by adjusting the value of the PFKFBPase  $V_{max}$  leaving the kinase  $V_{max}$  at its original value. Different  
325 K/P ratios are given in the literature based on specific tissue and cell type. The range varies from less than 1  
326 to 710 depending on the isoform of PFKFB expressed and the tissue type in which it is found. Notably,  
327 PFKFB is highly dependent on signaling and hormonal regulation, which can transiently change the K/P  
328 ratio given the stimulus. Signaling regulation was not considered in this model, though this component is of  
329 interest for further study. Thus, we aimed to keep F26BP relatively constant throughout the initial steady  
330 state testing to keep the flux toward a stable level. We found that the K/P ratio of 0.1 kept F26BP and all  
331 other metabolites constant over time, the given the parameters used. Therefore, the 0.1 K/P ratio was used  
332 to further test the ability of the model to simulate metabolite changes. Simulations were repeated for 30  
333 cells, once completed, the average concentrations of each metabolite per cell were graphed as a function of  
334 time (Fig 3).

335 **Fig 3. Steady state glycolytic flux.**

336 Metabolite concentrations were simulated with an input of 5 mM glucose over the course of 1200 seconds  
337 to model an unperturbed and constant state.

338

### 339 **GAPDH Inhibition**

340 *In vitro* experiments and model simulations were performed to assess the performance of the  
341 proposed queueing approach. FK866 is a non-competitive inhibitor of Nicotinamide phosphoribosyl  
342 transferase (NAMPT), the enzyme that supplies the majority of the intracellular pool of NAD<sup>+</sup>, a required  
343 substrate for the GAPDH reaction. Extensive research has been performed analyzing the effects of FK866  
344 on high glycolytic flux in cancer cells [38–41]. Under limited NAD<sup>+</sup> concentrations, the GAPDH reaction  
345 represents a bottleneck in glycolysis producing a block in the glycolytic flux. Experimental results show the  
346 upper level glycolytic metabolites, including G6P, F6P, F16BP, GAP and DHAP accumulate while the  
347 lower metabolites, 13BPG, 3PG/2PG, PEP, and PYR, decrease as substrates become unavailable. Thus, we  
348 hypothesized that with the reduction of GAPDH activity and consequently simulation of enzyme inhibition  
349 *in silico*, the model should be able to mimic the qualitative metabolic trends seen *in vitro*. Notably, kinetics  
350 and enzyme concentrations for the specific cancer cell lines were unknown, therefore, to account for the  
351 differences between the cancerous and non-cancerous simulations, the reaction rates were scaled (See  
352 Supplementary file S5). The effects of FK866 are presented in the experimental data provided by [40] in  
353 Figs 4, 6, 8 and 10, and by the present model outcomes of GAPDH activity inhibition in Figs 5, 7, 9 and  
354 11.

### 355 **Fig 4. Effects of FK866 on G6P and F6P concentrations in vitro.**

356 Experimental metabolomics data measuring G6P and F6P concentrations with the inhibitor FK866 in (solid  
357 blue and dashed green lines) A2780 and (red) HCT116 cancer cells.

### 358 **Fig 5. Effects of GAPDH Inhibition on G6P and F6P concentrations in silico.**

359 Simulation of the dynamics of glucose 6-phosphate (G6P) and fructose 6-phosphate (F6P) with the  
360 inhibition of Glyceraldehyde phosphate dehydrogenase (GAPDH). The V<sub>max</sub> of GAPDH was set at 0, 25,

361 50, 90, 95, 97, 98, 99, and 100 percent of its initial value in separate model simulations to simulate varied  
362 levels of pharmacological inhibition on the enzyme.

363 **Fig 6. Effects of FK866 on FBP concentrations in vitro.**

364 Experimental metabolomics data measuring fructose 1,6-bisphosphate concentrations with the inhibitor  
365 FK866 in (solid blue and dashed green lines) A2780 and (red) HCT116 cancer cells.

366 **Fig 7. Effects of GAPDH Inhibition on FBP concentrations in silico.**

367 Simulation of the dynamics of fructose 1, 6-bisphosphate (FBP) with the inhibition of Glyceraldehyde  
368 phosphate dehydrogenase (GAPDH). The  $V_{max}$  of GAPDH was set at 0, 25, 50, 90, 95, 97, 98, 99, and  
369 100 percent of its initial value in separate model simulations to simulate varied levels of pharmacological  
370 inhibition on the enzyme.

371 **Fig 8. Effects of FK866 on G6P and F6P concentrations in vitro.**

372 Experimental metabolomics data measuring GAP and DHAP concentrations with the inhibitor FK866 in  
373 (solid blue and dashed green lines) A2780 and (red) HCT116 cancer cells.

374 **Fig 9. Effects of GAPDH Inhibition on GAP and DHAP concentrations in silico.**

375 Simulation of the dynamics of glyceraldehyde 3-phosphate (GAP) and dihydroxyacetone phosphate  
376 (DHAP) with the inhibition of Glyceraldehyde phosphate dehydrogenase (GAPDH). The  $V_{max}$  of GAPDH  
377 was set at 0, 25, 50, 90, 95, 97, 98, 99, and 100 percent of its initial value in separate model simulations to  
378 simulate varied levels of pharmacological inhibition on the enzyme.

379 **Fig 10. Effects of FK866 on PEP concentrations in vitro.**

380 Experimental metabolomics data measuring G6P and F6P concentrations with the inhibitor FK866 in (solid  
381 blue and dashed green lines) A2780 and (red) HCT116 cancer cells.

382 **Fig 11. Effects of GAPDH Inhibition on PEP concentrations in silico.**

383 Simulation of the dynamics of phosphoenolpyruvate (PEP) with the inhibition of Glyceraldehyde  
384 phosphate dehydrogenase (GAPDH). The  $V_{max}$  of GAPDH was set at 0, 25, 50, 90, 95, 97, 98, 99, and



385 100 percent of its initial value in separate model simulations to simulate varied levels of pharmacological  
386 inhibition on the enzyme.

387 GAPDH activity was reduced by adjusting the  $V_{max}$  of the reaction catalyzed by GAPDH.  
388 Inhibition was simulated at 0%, 25%, 50%, 90%, 95%, 97%, 98%, 99%, 100% GAPDH activity, with each  
389 inhibitory level run as a separate simulation for a cell population of 30. The simulated results of GAPDH  
390 inhibition of G6P+F6P, F16BP, GAP+DHAP, and PEP, are plotted as dose response curves in Figs 5, 7, 9  
391 and 11 to reproduce the effect of metabolite changes from experimental (Figs 4, 6, 8 and 10)  
392 pharmacological inhibition of two cancerous cell lines. The FK866 inhibitor concentrations used in both  
393 A2780 ovarian and HCT116 colorectal cancer cell lines *in vitro*, were compared to *in silico* reduction of the  
394 percent GAPDH activity. Of note, we are making the assumption that at the lowest FK866 concentration  
395 (0.3 nM) used *in vitro* did not inhibit GAPDH activity, whereas the highest inhibitor concentrations (40  
396 nM) used completely inhibit its forward catalytic activity since the degree of inhibition corresponding to an  
397 exact inhibitor dosage is not reported. Thus, for the present comparisons we aimed to observe the  
398 qualitative metabolite changes within the experimental and simulated data, noting complications in making  
399 rigorous quantitative comparisons.

400 F16BP and PEP were measured reported as individual metabolites in the two cancer cell lines,  
401 A2780 and HCT116. The comparison of the simulated and experimental data is presented in Figs 6-7 and  
402 10-11. Because of the difficulties in distinguishing isobaric metabolites from one another, G6P+F6P and  
403 GAP+DHAP were grouped in the experimental data, and the sum of these metabolites are reported. The  
404 model is able to determine the individual metabolite concentrations, however, following each simulation  
405 the two metabolites from the model data (G6P+F6P and GAP+DHAP) were added for a closer comparison  
406 to the experimental data. Moreover, the data was normalized so that each experiment (*in vitro* and *in silico*)  
407 began with the same metabolite concentration, again for a clearer comparison of the actual changes  
408 occurring as FK866 doses increased (experimental) and as GAPDH inhibition increased (model  
409 simulations).

410 *In silico*, we observed increases in all upper glycolytic metabolites with inhibition of GAPDH,  
411 supporting the metabolic data of NAMPT inhibition. The lower glycolytic metabolite, PEP shows reduction  
412 following increased inhibition of GAPDH, in agreement the results seen in the experimental data. Using a  
413 K/P ratio of 0.1, F26BP was the only metabolite that did not change mean values over time throughout the  
414 course of GAPDH inhibition at any level. Notably, the experimental data shows a fairly wide range of  
415 metabolite concentrations with similar inhibitor doses, between and even within both cell lines. For  
416 example, the G6P+F6P concentration in the HCT116 cell line increased from 0.052 mM to 0.512 mM with  
417 the highest FK866 treatment, and in the two separate experiments with the A2780 cells the metabolite  
418 concentrations increased to only 0.18 mM and 0.13 mM (Fig 4). Again, the aim for the inhibition  
419 simulations was to observe the overall trend of metabolite changes, meant for a qualitative comparison.  
420 There are slight variations from the experimental data and the model data. Still the results are similar or  
421 within range of the experimental data; in the model simulation the F16BP concentration increased from  
422 0.0022 mM to 0.0548 mM at the highest inhibition level, while the F16BP concentration in the HCT116  
423 cell line rose from 0.0022 mM to 0.0496 mM at the highest FK866 treatment (Figs 6-7). Specific kinetics  
424 and prior knowledge of experimental data may only aid in reproducing even more consistent results in the  
425 future.

426 The glycolysis model was additionally simulated in the SimBiology app in MatLab using the  
427 ode15s solver [32]. The rate equations, parameters and initial concentrations were identical to those used in  
428 the queueing theory model in the steady state simulation. When running the simulations, the metabolites  
429 reached steady state levels up to 10 seconds. Following the 10 second mark, however 2PG and 3PG  
430 progressed to positive infinity and negative infinity, respectively. Moreover, many metabolites had negative  
431 concentration values in the steady state simulations. The compiled SimBiology ode15s solver was easy to  
432 both operate and simulate deterministic outcomes quickly, however the simulation produced unstable and  
433 negative values. As mentioned in the methods section, queueing theory modeling ensures positive  
434 concentrations, a clear benefit when attempting to track metabolite or biological species concentration

435 changes. In the uncompiled version, the current queueing theory model was able to complete 20 minutes of  
436 simulation time for 30 cells in roughly two hours.

437

## 438 **Conclusion**

439 The paper presents a pathway model of glycolysis as a queueing network, a modeling approach  
440 widely used in modeling telecommunication packet networks. Dynamic modeling of biological systems,  
441 while exceptionally useful poses certain limitations computationally and in reproducing observed  
442 phenotypic changes. The application of queueing theory in dynamical modeling may offer a method to  
443 overcome such limitations. The current applications of this work hold significant promise for advancing  
444 computational biology and biochemical research. The queueing theory represents a mainstay modeling  
445 approach of telecommunication networks with application to simulate intracellular metabolism. By viewing  
446 enzymes as “gates” and their substrates as “packets,” we have reduced the computational complexity of the  
447 simulation to the advantage of much more rapid calculation. Moreover, we have shown previously that we  
448 can model intracellular mechanisms and do so while simulating the random variation which exists between  
449 and within living cells.

450 Research and experimental techniques in metabolomics have rapidly evolved since its introduction.  
451 Modeling strategies must also be able to be adaptable to accommodate novel information and amend the  
452 data as needed. The modularity of queues incorporated provides a suitable approach for further model  
453 extension, whether that be additional metabolic reactions, parameter refinement, or multi-scale modelling  
454 approaches. Moreover, this approach enables the ability to simulate biochemical reactions stochastically  
455 without the need to implement or solve stochastic algorithms. As seen above, GAP and DHAP were  
456 represented experimentally as a combination of metabolic intermediates, due to their chemical similarities.  
457 Although MS technological methods have become increasingly sensitive to detecting small molecules,  
458 isobaric metabolites are often difficult to distinguish from one another. This is the case not only for several  
459 metabolic intermediates of glycolysis, but also to additional metabolic pathways. An advantage to the in

460 silico mechanistic modeling of metabolic networks, is the ability to represent such metabolites as individual  
461 entities investigating distinct metabolic reactions and the dynamics of each metabolite providing a more in-  
462 depth observation of the intracellular interactions.

463         The need for models to be informed from and then simulate data using metabolomics sources  
464 represents a significant advance in future possibilities of the use of this approach. With the small-scale  
465 investigation and advanced and large-scale experimental biology, computers have become pivotal in not  
466 only managing data but also in understanding the biological significance of the results and developing  
467 further hypotheses for future research. Due to the ability to change variables and quickly analyze the  
468 resulting metabolic effects, investigators can then simulate the effects of drugs or mutation on such  
469 processes. In all, the ability to accurately and quickly simulate intracellular and intra-tissue pathways  
470 represents a considerable leap forward in the ability to understand central biochemical underpinnings of  
471 cellular life. The advancement of technology in both experimental biology and computational systems has  
472 allowed scientific discovery and investigation on the chemical level. Elucidation of intracellular metabolite  
473 and chemical dynamics can provide valuable insight into how cells utilize cellular components to grow,  
474 respond to environmental stimuli, and ultimately support life. While deterministic models are able to  
475 describe glucose metabolism and metabolic systems in general, we believe queuing theory may have the  
476 potential to more realistically describe metabolic behavior by providing stochasticity to the pathway. In  
477 summary, the current study presents the application of queuing theory as a beneficial modeling approach in  
478 simulating metabolic pathway dynamics and predicting the effects of pharmacological inhibition.

479

## 480 **Acknowledgments**

481         The following support is acknowledged: NIH GM103427 (PHD), and the University of Nebraska at  
482 Omaha Office of Research and Creative Activities FUSE and GRACA program (EC). This work utilized the  
483 Holland Computing Center of the University of Nebraska, which receives support from the Nebraska  
484 Research Initiative.

## References

- 485 1. Kanehisa M, Goto S. KEGG: kyoto encyclopedia of genes and genomes. *Nucleic Acids Res.* 2000 Jan  
486 1;28(1):27–30.
- 487 2. Hahl SK, Kremling A. A Comparison of Deterministic and Stochastic Modeling Approaches for  
488 Biochemical Reaction Systems: On Fixed Points, Means, and Modes. *Front Genet* [Internet]. 2016  
489 Aug 31 [cited 2017 Jun 26];7. Available from:  
490 <http://journal.frontiersin.org/Article/10.3389/fgene.2016.00157/abstract>
- 491 3. Rapoport TA, Heinrich R, Rapoport SM. The regulatory principles of glycolysis in erythrocytes in  
492 vivo and in vitro. A minimal comprehensive model describing steady states, quasi-steady states and  
493 time-dependent processes. *Biochem J.* 1976 Feb 15;154(2):449–69.
- 494 4. Voit EO. The best models of metabolism: The best models of metabolism. *Wiley Interdiscip Rev Syst*  
495 *Biol Med.* 2017 May 19;e1391.
- 496 5. Puchalka J, Kierzek AM. Bridging the Gap between Stochastic and Deterministic Regimes in the  
497 Kinetic Simulations of the Biochemical Reaction Networks. *Biophys J.* 2004 Mar;86(3):1357–72.
- 498 6. Cao Y, Petzold L. Slow-scale tau-leaping method. *Comput Methods Appl Mech Eng.* 2008  
499 Aug;197(43–44):3472–9.
- 500 7. Gillespie DT. Exact stochastic simulation of coupled chemical reactions. *J Phys Chem.* 1977  
501 Dec;81(25):2340–61.
- 502 8. Ao P. Metabolic network modelling: Including stochastic effects. *Comput Chem Eng.* 2005  
503 Oct;29(11–12):2297–303.
- 504 9. Kampen NG van. *Stochastic processes in physics and chemistry.* 3rd ed. Amsterdam ; Boston:  
505 Elsevier; 2007. 463 p. (North-Holland personal library).
- 506 10. Kremling A, Bettenbrock K, Gilles E. Analysis of global control of Escherichia coli carbohydrate  
507 uptake. *BMC Syst Biol.* 2007;1(1):42.
- 508 11. Lopez-Caamal F, Marquez-Lago TT. Order Reduction of the Chemical Master Equation via Balanced  
509 Realisation. Kaderali L, editor. *PLoS ONE.* 2014 Aug 14;9(8):e103521.
- 510 12. Tyson JJ, Othmer HG. The Dynamics of Feedback Control Circuits in Biochemical Pathways. In:  
511 *Progress in Theoretical Biology* [Internet]. Elsevier; 1978 [cited 2017 Jun 26]. p. 1–62. Available  
512 from: <http://linkinghub.elsevier.com/retrieve/pii/B9780125431057500087>
- 513 13. Wu J, Vidakovic B, Voit EO. Constructing stochastic models from deterministic process equations by  
514 propensity adjustment. *BMC Syst Biol.* 2011;5(1):187.
- 515 14. Massey WA. Asymptotic Analysis of the Time Dependent M/M/1 Queue. *Math Oper Res.* 1985  
516 May;10(2):305–27.
- 517 15. Neuts MF, Chen S-Z. The Infinite-Server Queue with Poisson Arrivals and Semi-Markovian Services.  
518 *Oper Res.* 1972 Apr;20(2):425–33.

- 519 16. Kendall DG. Stochastic Processes Occurring in the Theory of Queues and their Analysis by the  
520 Method of the Imbedded Markov Chain. *Ann Math Stat.* 1953 Sep;24(3):338–54.
- 521 17. Sharp AT, Pannier AK, Wysocki BJ, Wysocki TA. A novel telecommunications-based approach to  
522 HIV modeling and simulation. *Nano Commun Netw.* 2012 Jun;3(2):129–37.
- 523 18. Guo D, Zhang G, Wysocki TA, Wysocki BJ, Gelbard HA, Liu X-M, McMillan JM, Gendelman HE.  
524 Endosomal trafficking of nanoformulated antiretroviral therapy facilitates drug particle carriage and  
525 HIV clearance. *J Virol.* 2014 Sep 1;88(17):9504–13.
- 526 19. Martin T, Wysocki B, Wysocki T, Pannier A. Identifying Intracellular pDNA Losses From a Model of  
527 Nonviral Gene Delivery. *IEEE Trans Nanobioscience.* 2015 Jan 23;
- 528 20. Evstigneev VP, Holyavka MG, Khrapatiy SV, Evstigneev MP. Theoretical description of metabolism  
529 using queueing theory. *Bull Math Biol.* 2014 Sep;76(9):2238–48.
- 530 21. Hochendoner P, Ogle C, Mather WH. A queueing approach to multi-site enzyme kinetics. *Interface*  
531 *Focus.* 2014 Jun 6;4(3):20130077.
- 532 22. Jezewski AJ, Larson JJ, Wysocki B, Davis PH, Wysocki T. A novel method for simulating insulin  
533 mediated GLUT4 translocation. *Biotechnol Bioeng.* 2014 Dec;111(12):2454–65.
- 534 23. Rao CV, Wolf DM, Arkin AP. Control, exploitation and tolerance of intracellular noise. *Nature.* 2002  
535 Nov 14;420(6912):231–7.
- 536 24. Berg JM, Tymoczko JL, Stryer L, Stryer L. *Biochemistry.* 5th ed. New York: W.H. Freeman; 2002. 1  
537 p.
- 538 25. Mulukutla BC, Yongky A, Daoutidis P, Hu W-S. Bistability in glycolysis pathway as a physiological  
539 switch in energy metabolism. *PloS One.* 2014;9(6):e98756.
- 540 26. Infante G. Positive solutions of differential equations with nonlinear boundary conditions. 2003.
- 541 27. Erbe LH, Wang H. On the existence of positive solutions of ordinary differential equations. *Proc Am*  
542 *Math Soc.* 1994 Mar 1;120(3):743–743.
- 543 28. Mathworks. Matlab Documentation- Choose an ODE Solver. [Internet]. Available from:  
544 <http://www.mathworks.com/help/matlab/math/choose-an-ode-solver.html>
- 545 29. Schuster S, Fell DA, Dandekar T. A general definition of metabolic pathways useful for systematic  
546 organization and analysis of complex metabolic networks. *Nat Biotechnol.* 2000 Mar;18(3):326–32.
- 547 30. Clement, EJ, Wysocki, BJ, Davis, PH, Wysocki, TA. On a Queueing Theory Method to Simulate In-  
548 Silico Metabolic Networks. *Curr Metabolomics.* 2017;5.
- 549 31. Wysocki BJ, Martin TM, Wysocki TA, Pannier AK. Simulation supported estimation of end-to-end  
550 transmission parameters in non-viral gene delivery. In *IEEE*; 2014 [cited 2016 Sep 29]. p. 4179–83.  
551 Available from: <http://ieeexplore.ieee.org/lpdocs/epic03/wrapper.htm?arnumber=6883976>
- 552 32. Levy Y. Introduction to queueing theory, 2nd ed., by Robert B. Cooper, Elsevier North Holland, New  
553 York, 1981, 347 pp. *Networks.* 1983;13(1):155–6.

- 554 33. Degenring D, Röhl M, Uhrmacher AM. Discrete event, multi-level simulation of metabolite  
555 channeling. *Biosystems*. 2004 Jul;75(1–3):29–41.
- 556 34. Hasmann M, Schemainda I. FK866, a highly specific noncompetitive inhibitor of nicotinamide  
557 phosphoribosyltransferase, represents a novel mechanism for induction of tumor cell apoptosis.  
558 *Cancer Res*. 2003 Nov 1;63(21):7436–42.
- 559 35. Moore Z, Chakrabarti G, Luo X, Ali A, Hu Z, Fattah FJ, Vemireddy R, DeBerardinis RJ, Brekken  
560 RA, Boothman DA. NAMPT inhibition sensitizes pancreatic adenocarcinoma cells to tumor-selective,  
561 PAR-independent metabolic catastrophe and cell death induced by  $\beta$ -lapachone. *Cell Death Dis*. 2015  
562 Jan 15;6(1):e1599.
- 563 36. Tan B, Young DA, Lu Z-H, Wang T, Meier TI, Shepard RL, Roth K, Zhai Y, Huss K, Kuo M-S,  
564 Gillig J, Parthasarathy S, Burkholder TP, Smith MC, Geeganage S, Zhao G. Pharmacological  
565 Inhibition of Nicotinamide Phosphoribosyltransferase (NAMPT), an Enzyme Essential for NAD<sup>+</sup>  
566 Biosynthesis, in Human Cancer Cells: METABOLIC BASIS AND POTENTIAL CLINICAL  
567 IMPLICATIONS. *J Biol Chem*. 2013 Feb 1;288(5):3500–11.
- 568 37. Tolstikov V, Nikolayev A, Dong S, Zhao G, Kuo M-S. Metabolomics Analysis of Metabolic Effects  
569 of Nicotinamide Phosphoribosyltransferase (NAMPT) Inhibition on Human Cancer Cells. Campos-  
570 Olivas R, editor. *PLoS ONE*. 2014 Dec 8;9(12):e114019.

571 **Supporting Information**

572 **S1. Pseudo Code.**

573 **S2. Kinetic Constants and Parameters of the model.**

574 **S3. Rate Equations used in the model.**

575 **S4. Maximal Velocities.**

576 **S5. Rate Files**



**Table 1. Initial Concentrations of Glycolytic Metabolites**

| Metabolite | Concentration(mM) | Reference |
|------------|-------------------|-----------|
| GLC        | 5.0               | [1]       |
| G6P        | 0.039             | [1]       |
| F6P        | 0.013             | [1]       |
| F1,6BP     | 0.00231           | [1]       |
| F2,6BP     | 0.004             | [3]       |
| DHAP       | 0.02              | [2]       |
| GAP        | 0.00194           | [2]       |
| 1,3BPG     | 0.000369          | [1]       |
| 3PG        | 0.069             | [1]       |
| 2PG        | 0.01              | [1]       |
| PEP        | 0.017             | [1]       |
| PYR        | 0.0586            | [1]       |

Intracellular concentrations for each metabolic intermediate. The metabolite concentrations (millimolar) are used in each simulation to initiate the model and are allowed to change over the course of the simulation.

1. Mulquiney PJ, Kuchel PW. Model of 2,3-bisphosphoglycerate metabolism in the human erythrocyte based on detailed enzyme kinetic equations: equations and parameter refinement. *Biochem J.* 1999 Sep 15;342 Pt 3:581–96.
2. König M, Bulik S, Holzhütter H-G. Quantifying the contribution of the liver to glucose homeostasis: a detailed kinetic model of human hepatic glucose metabolism. *PLoS Comput Biol.* 2012;8(6):e1002577.
3. du Preez FB, Conradie R, Penkler GP, Holm K, van Dooren FLJ, Snoep JL. A comparative analysis of kinetic models of erythrocyte glycolysis. *J Theor Biol.* 2008 Jun 7;252(3):488–96.

**Table 2. Additional Metabolites and Energy Nucleotides**

| Metabolite | Concentration(mM) | Reference |
|------------|-------------------|-----------|
| MgATP      | 1.52              | [1]       |
| MgADP      | 0.11              | [1]       |
| NAD        | 0.0599            | [1]       |
| NADH       | 0.000245          | [1]       |
| Pi         | 1.0               | [1]       |
| Mg         | 0.4               | [1]       |
| ATP        | 0.159             | [1]       |
| ADP        | 0.0937            | [1]       |
| AMP        | 0.03              | [1]       |
| H+         | 0.0000721         | [2]       |
| 2,3BPG     | 3.1               | [1]       |
| GSH        | 3.2               | [1]       |
| ALA        | 0.2               | [3]       |
| G16BP      | 0.106             | [1]       |

Intracellular concentrations required for rate equation calculations. The following metabolites influence the kinetics of the reactions yet were held constant for simulations to directly highlight concentration changes seen in glycolytic intermediates.

1. Mulquiney PJ, Kuchel PW. Model of 2,3-bisphosphoglycerate metabolism in the human erythrocyte based on detailed enzyme kinetic equations: equations and parameter refinement. *Biochem J.* 1999 Sep 15;342 Pt 3:581–96.
2. König M, Bulik S, Holzhütter H-G. Quantifying the contribution of the liver to glucose homeostasis: a detailed kinetic model of human hepatic glucose metabolism. *PLoS Comput Biol.* 2012;8(6):e1002577.
3. Groen AK, Sips HJ, Vervoorn RC, Tager JM. Intracellular compartmentation and control of alanine metabolism in rat liver parenchymal cells. *Eur J Biochem FEBS.* 1982 Feb;122(1):87–93.

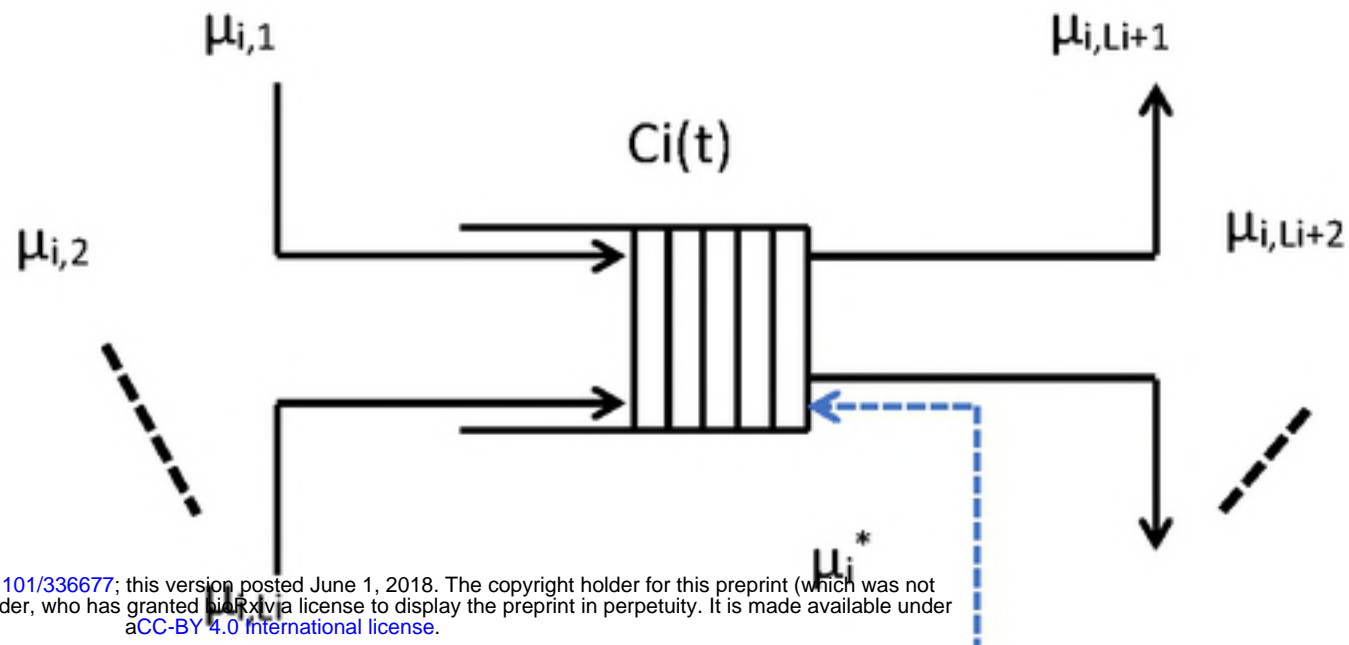

bioRxiv preprint doi: <https://doi.org/10.1101/336677>; this version posted June 1, 2018. The copyright holder for this preprint (which was not certified by peer review) is the author/funder, who has granted bioRxiv a license to display the preprint in perpetuity. It is made available under aCC-BY 4.0 International license.

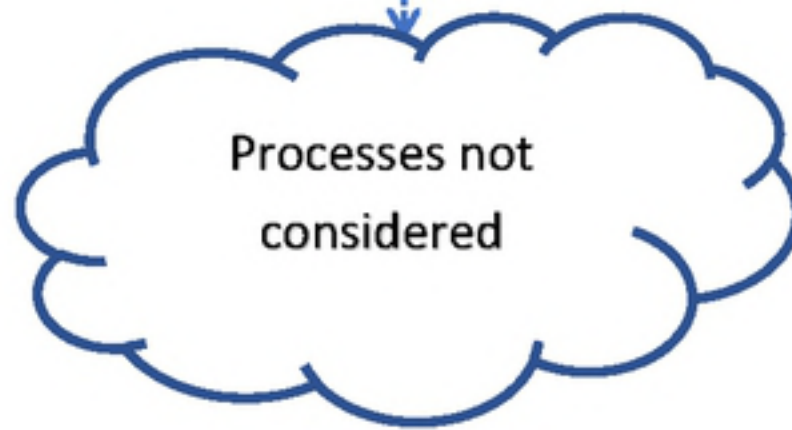

bioRxiv preprint doi: <https://doi.org/10.1101/336677>; this version posted June 1, 2018. The copyright holder for this preprint (which was not certified by peer review) is the author/funder, who has granted bioRxiv a license to display the preprint in perpetuity. It is made available under aCC-BY 4.0 International license.

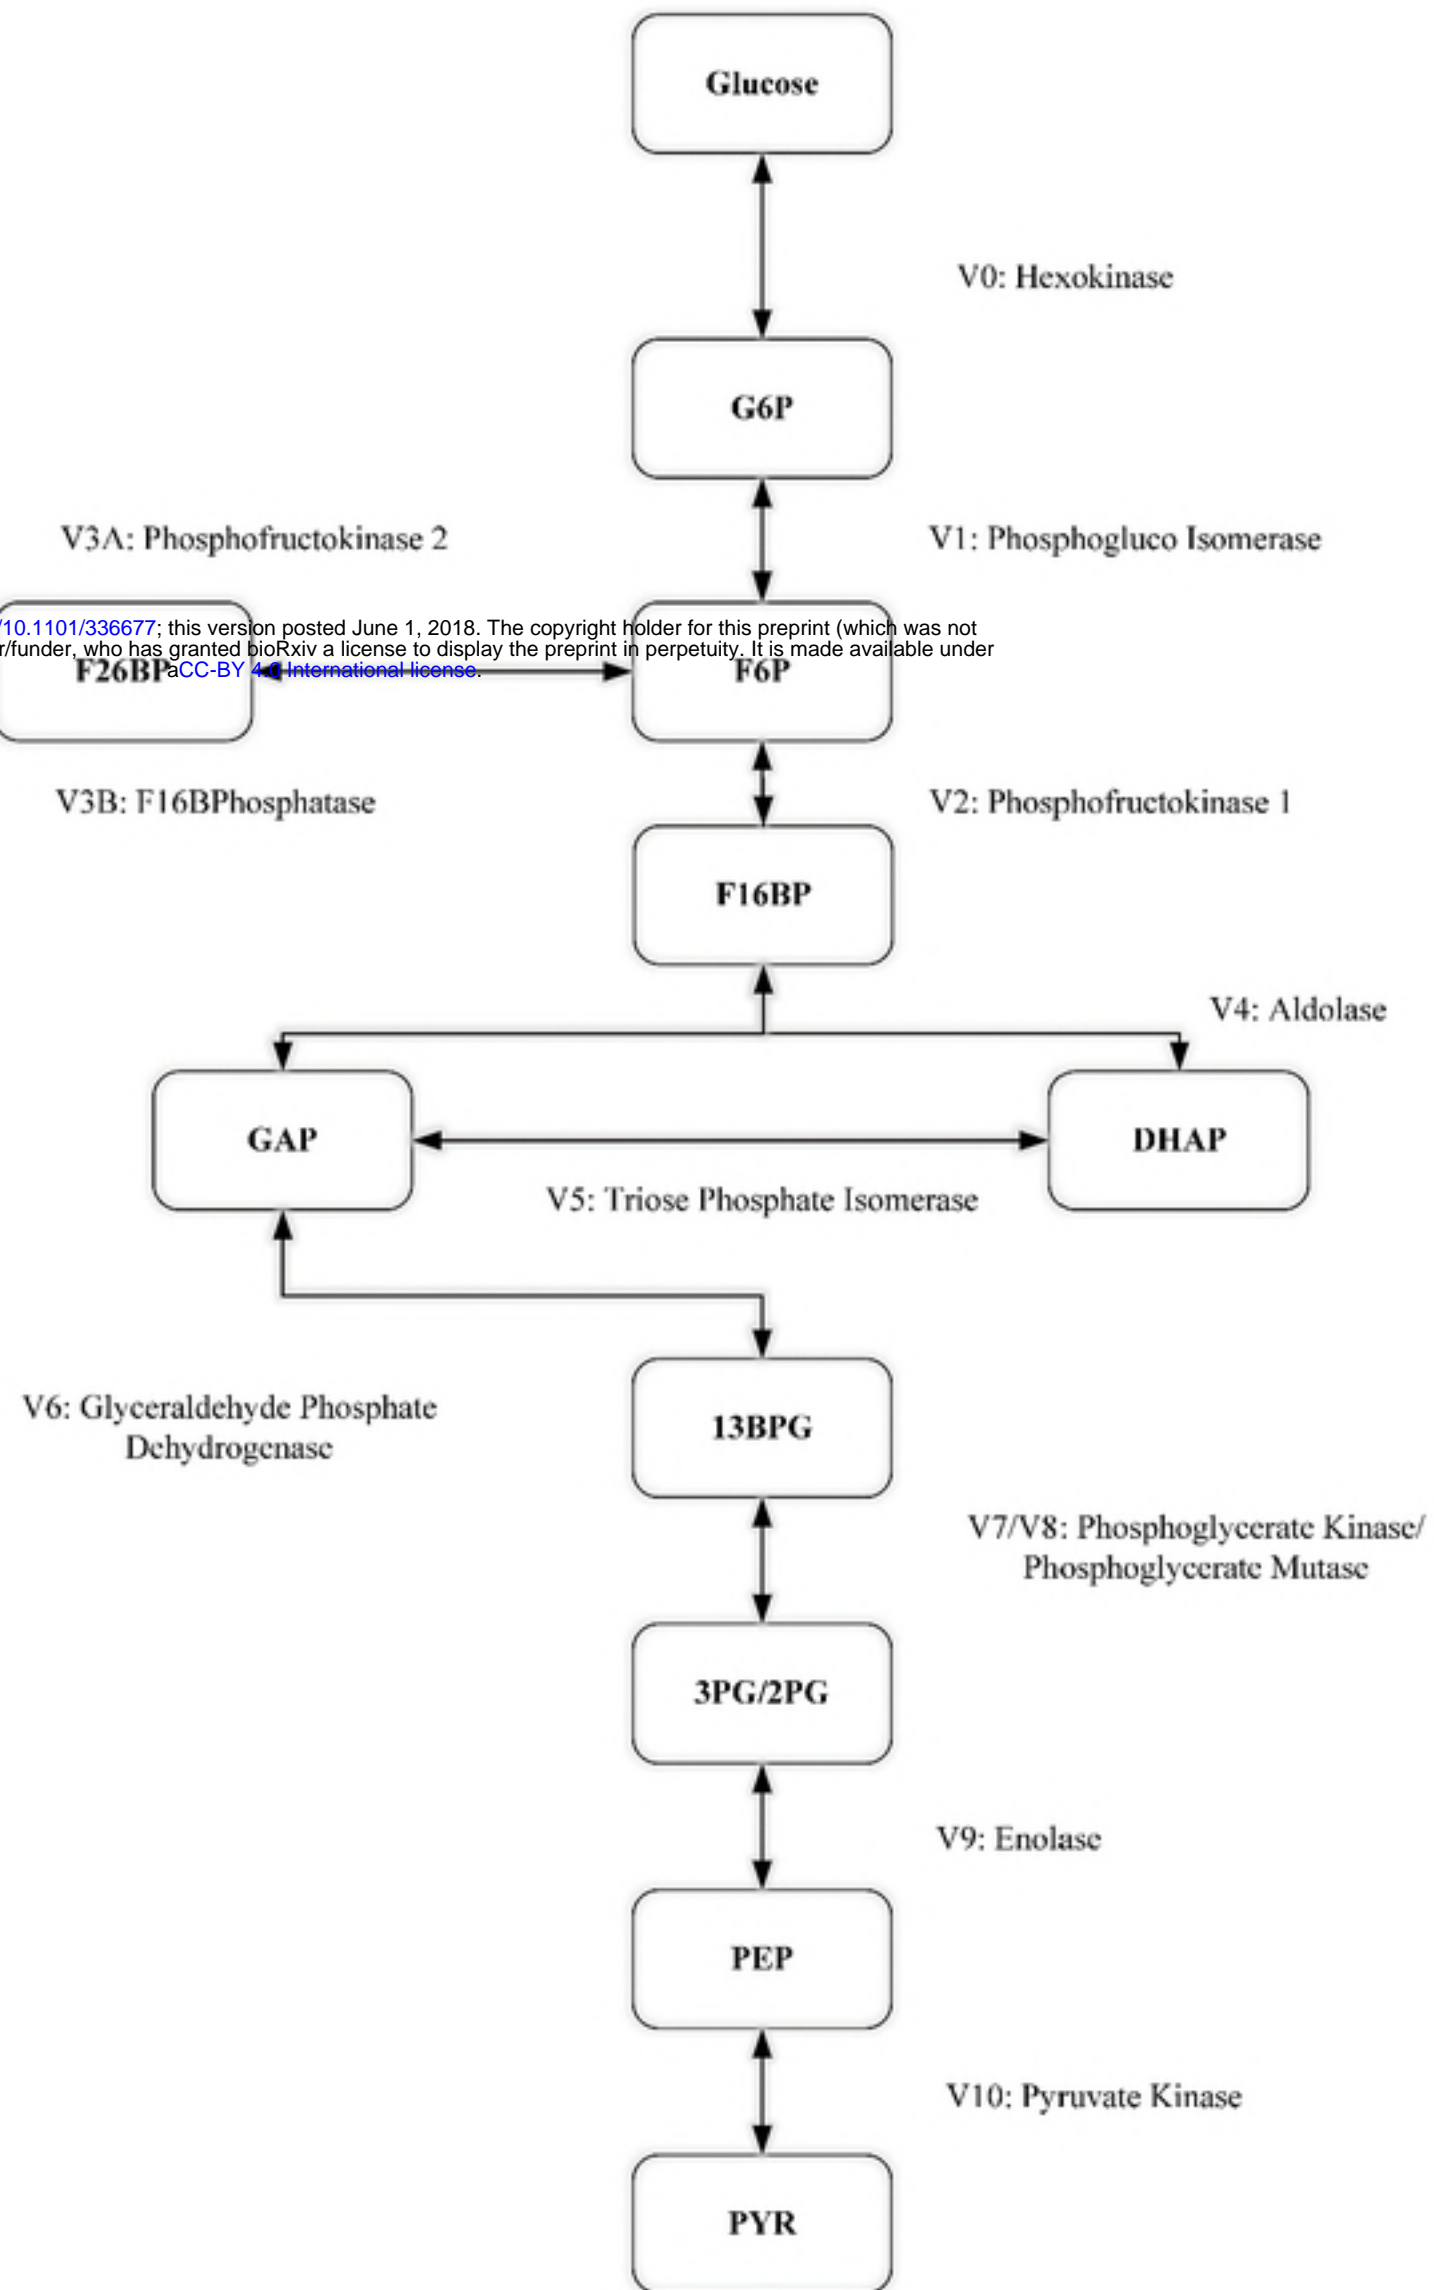

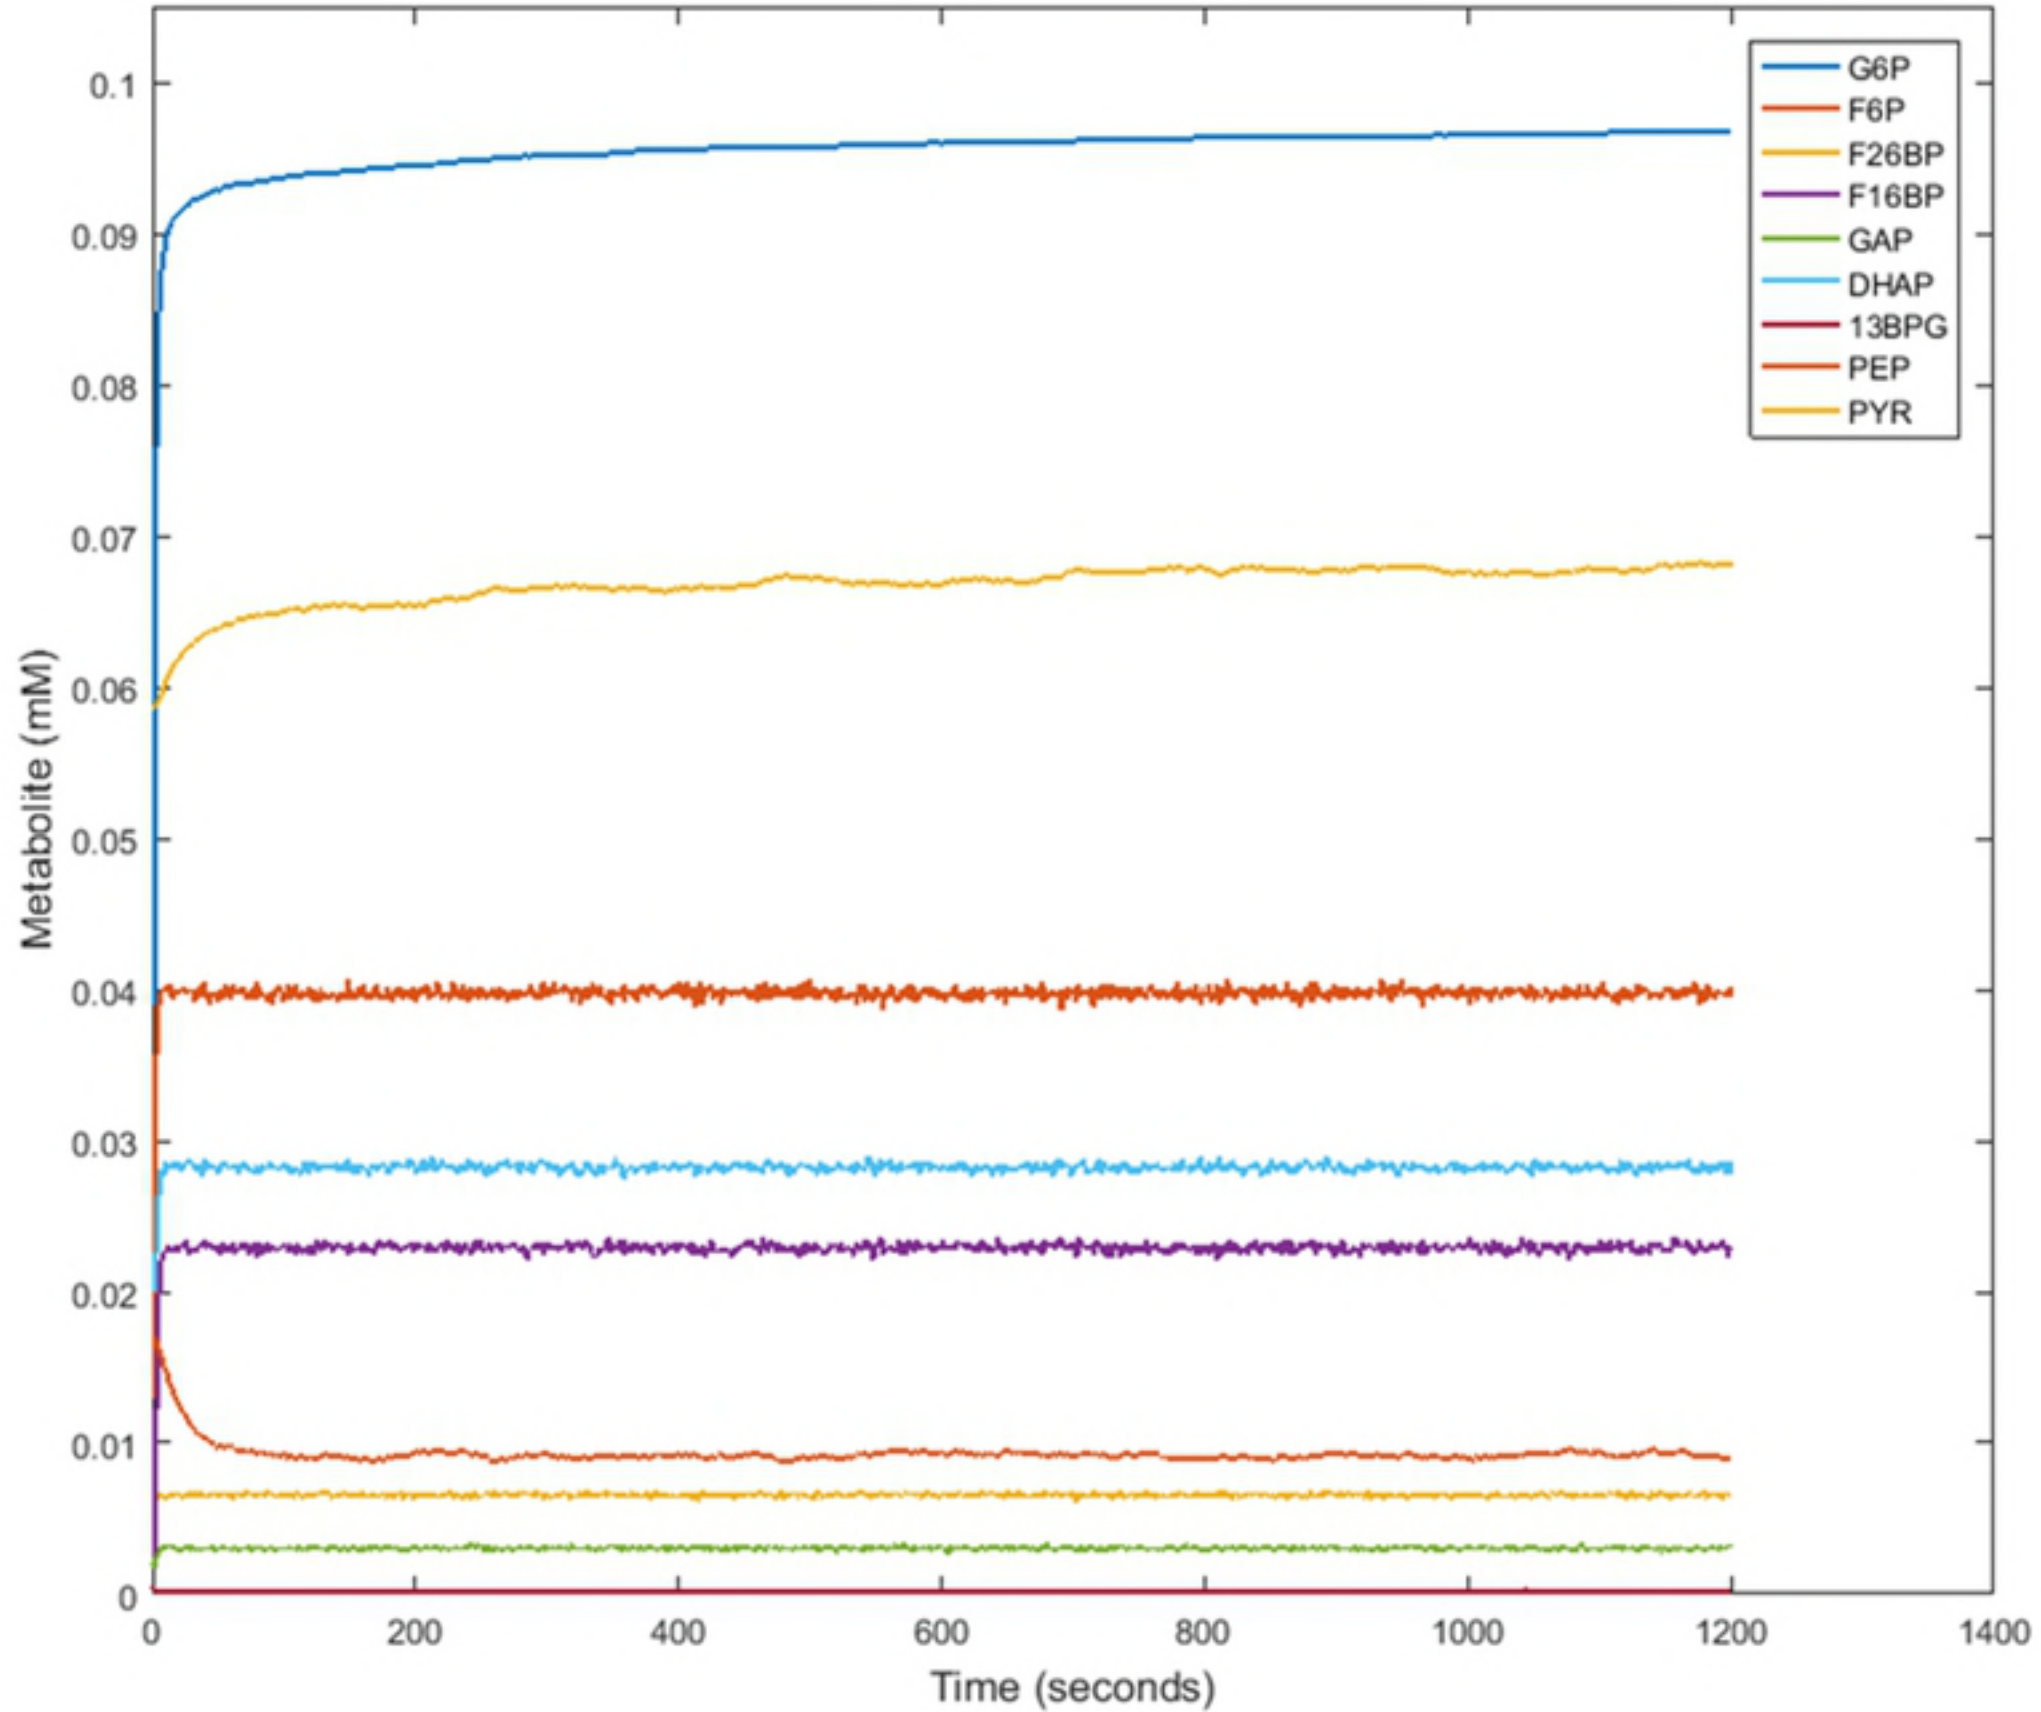

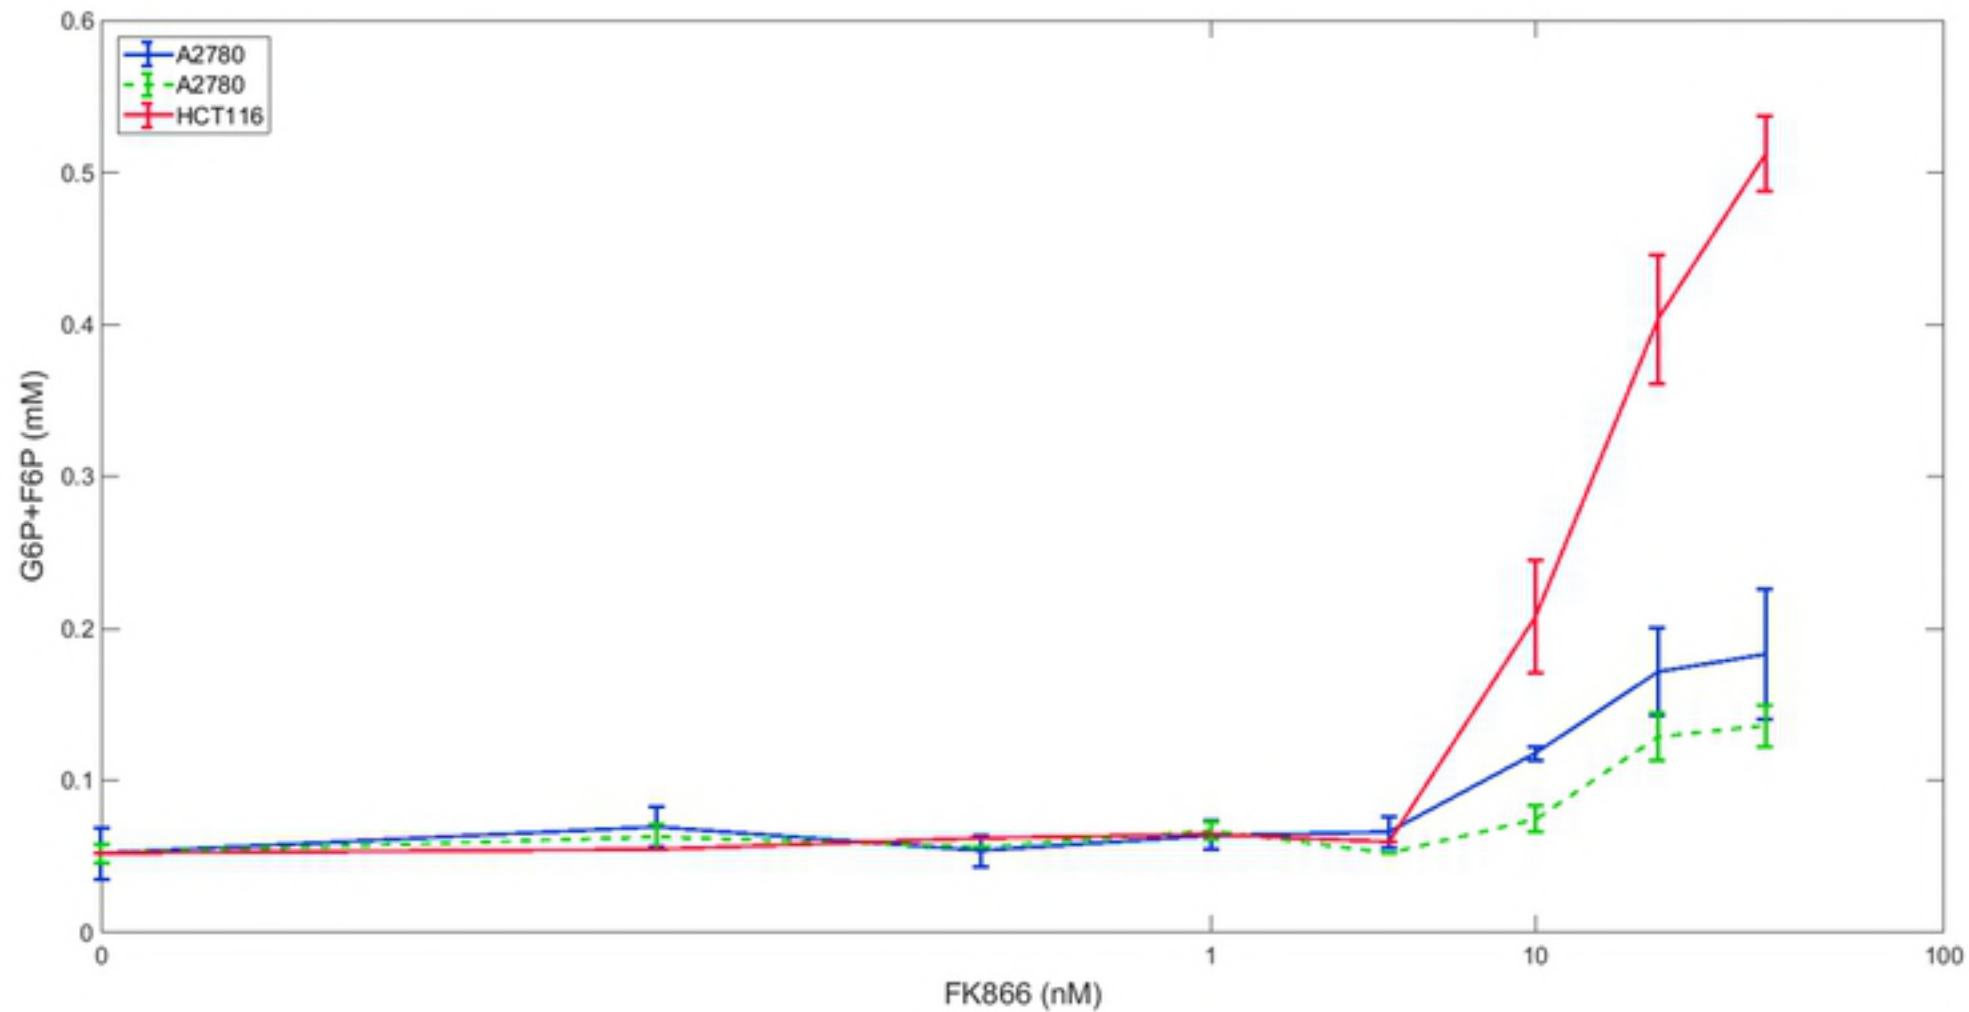

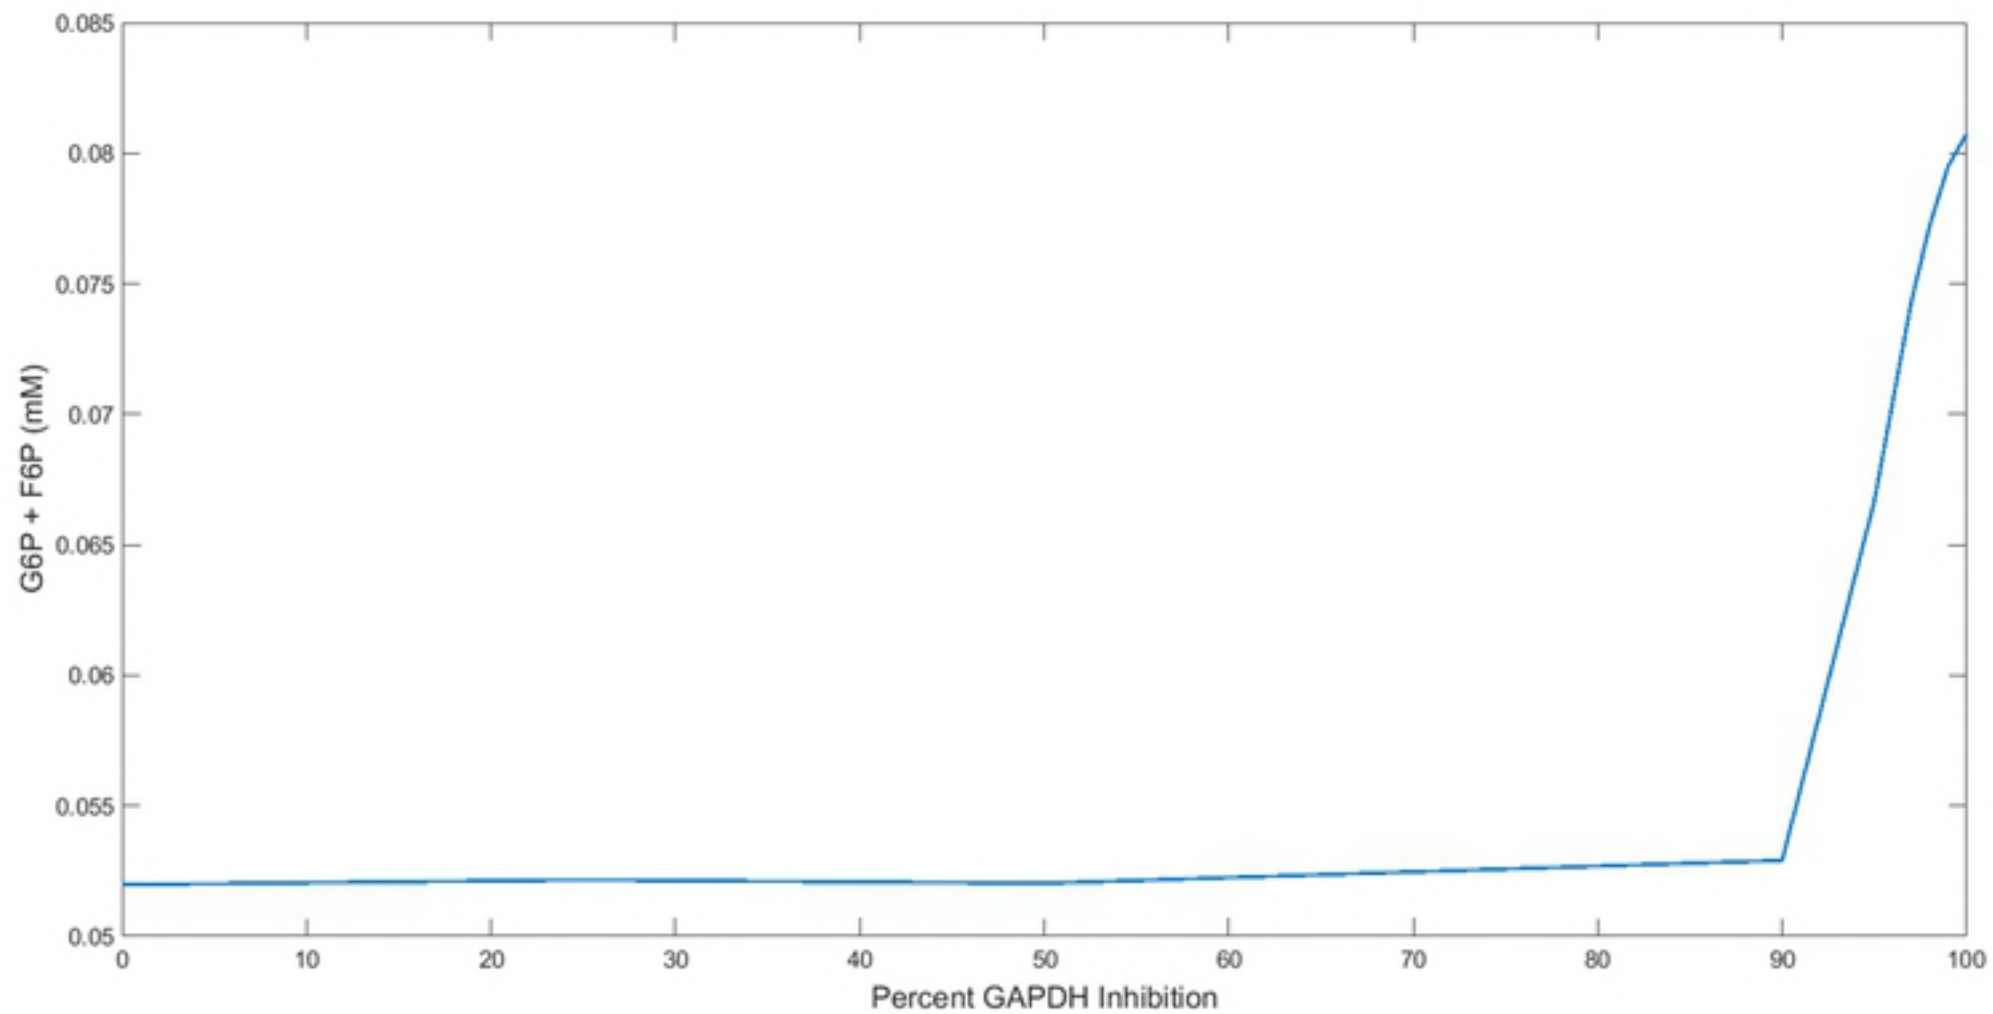

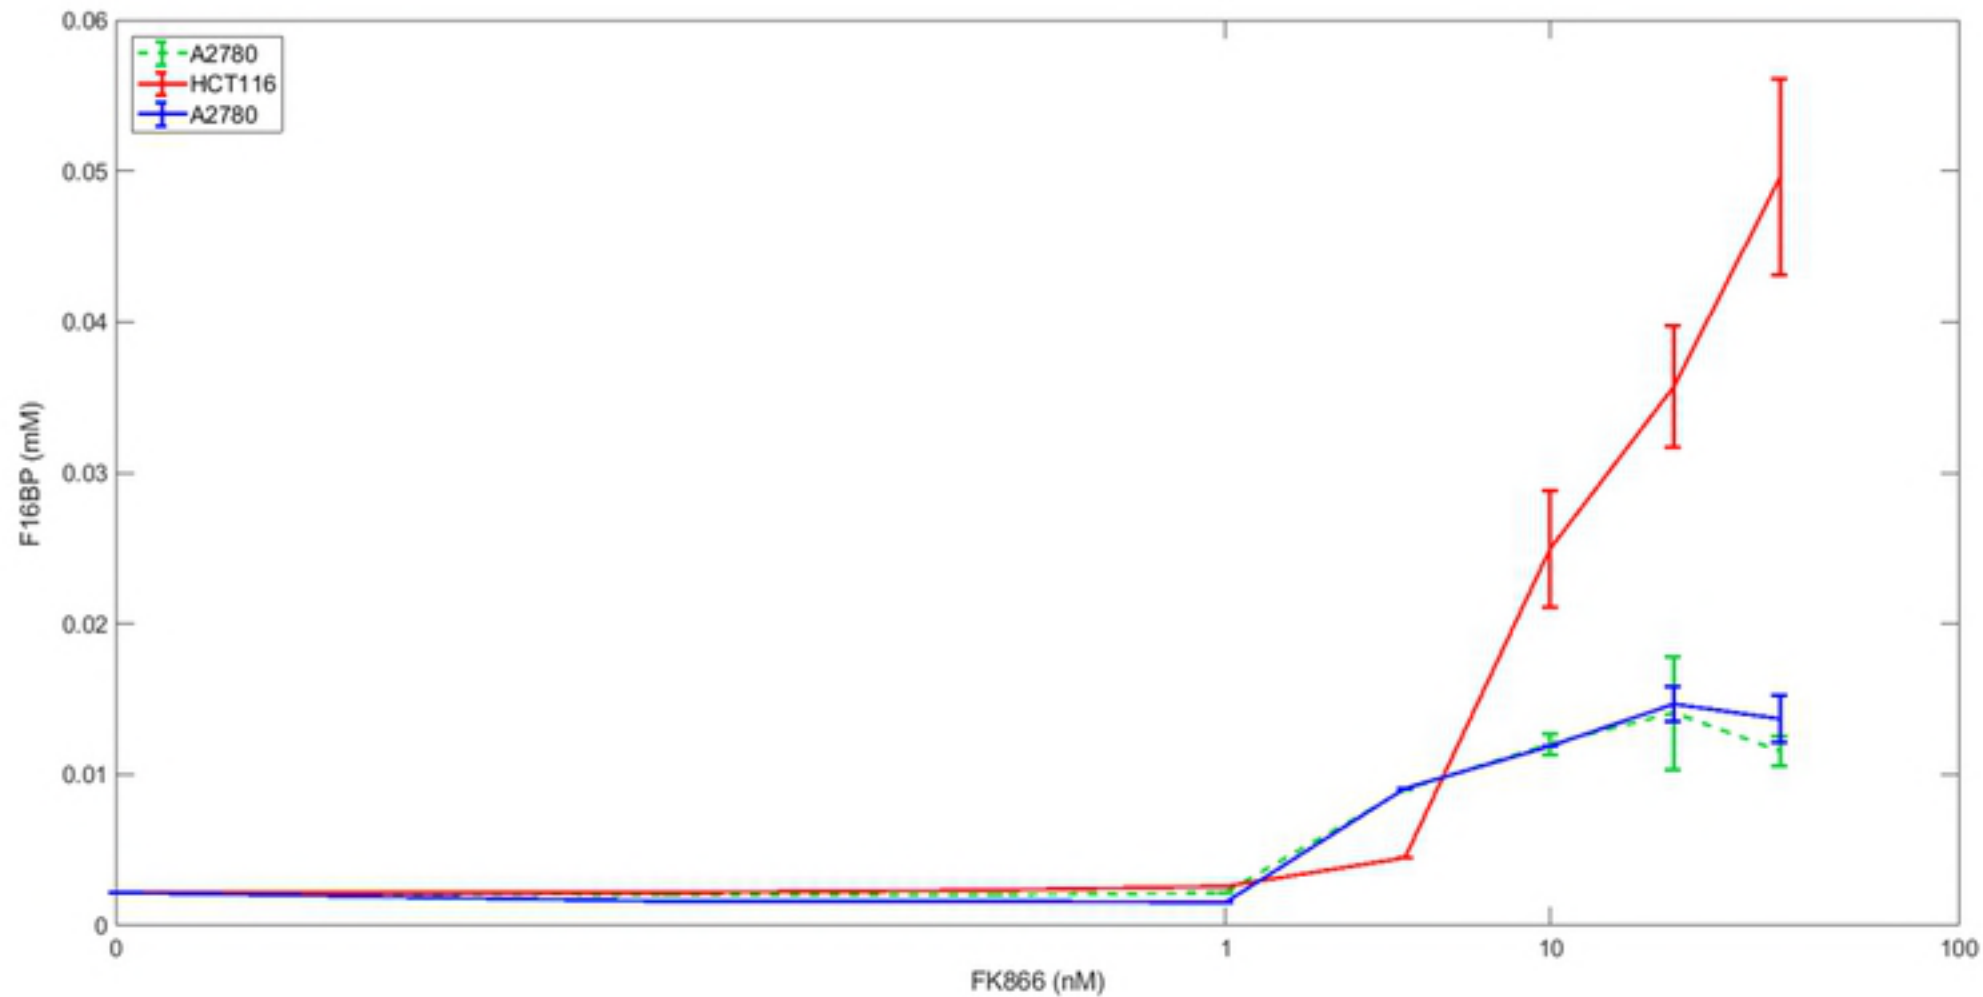



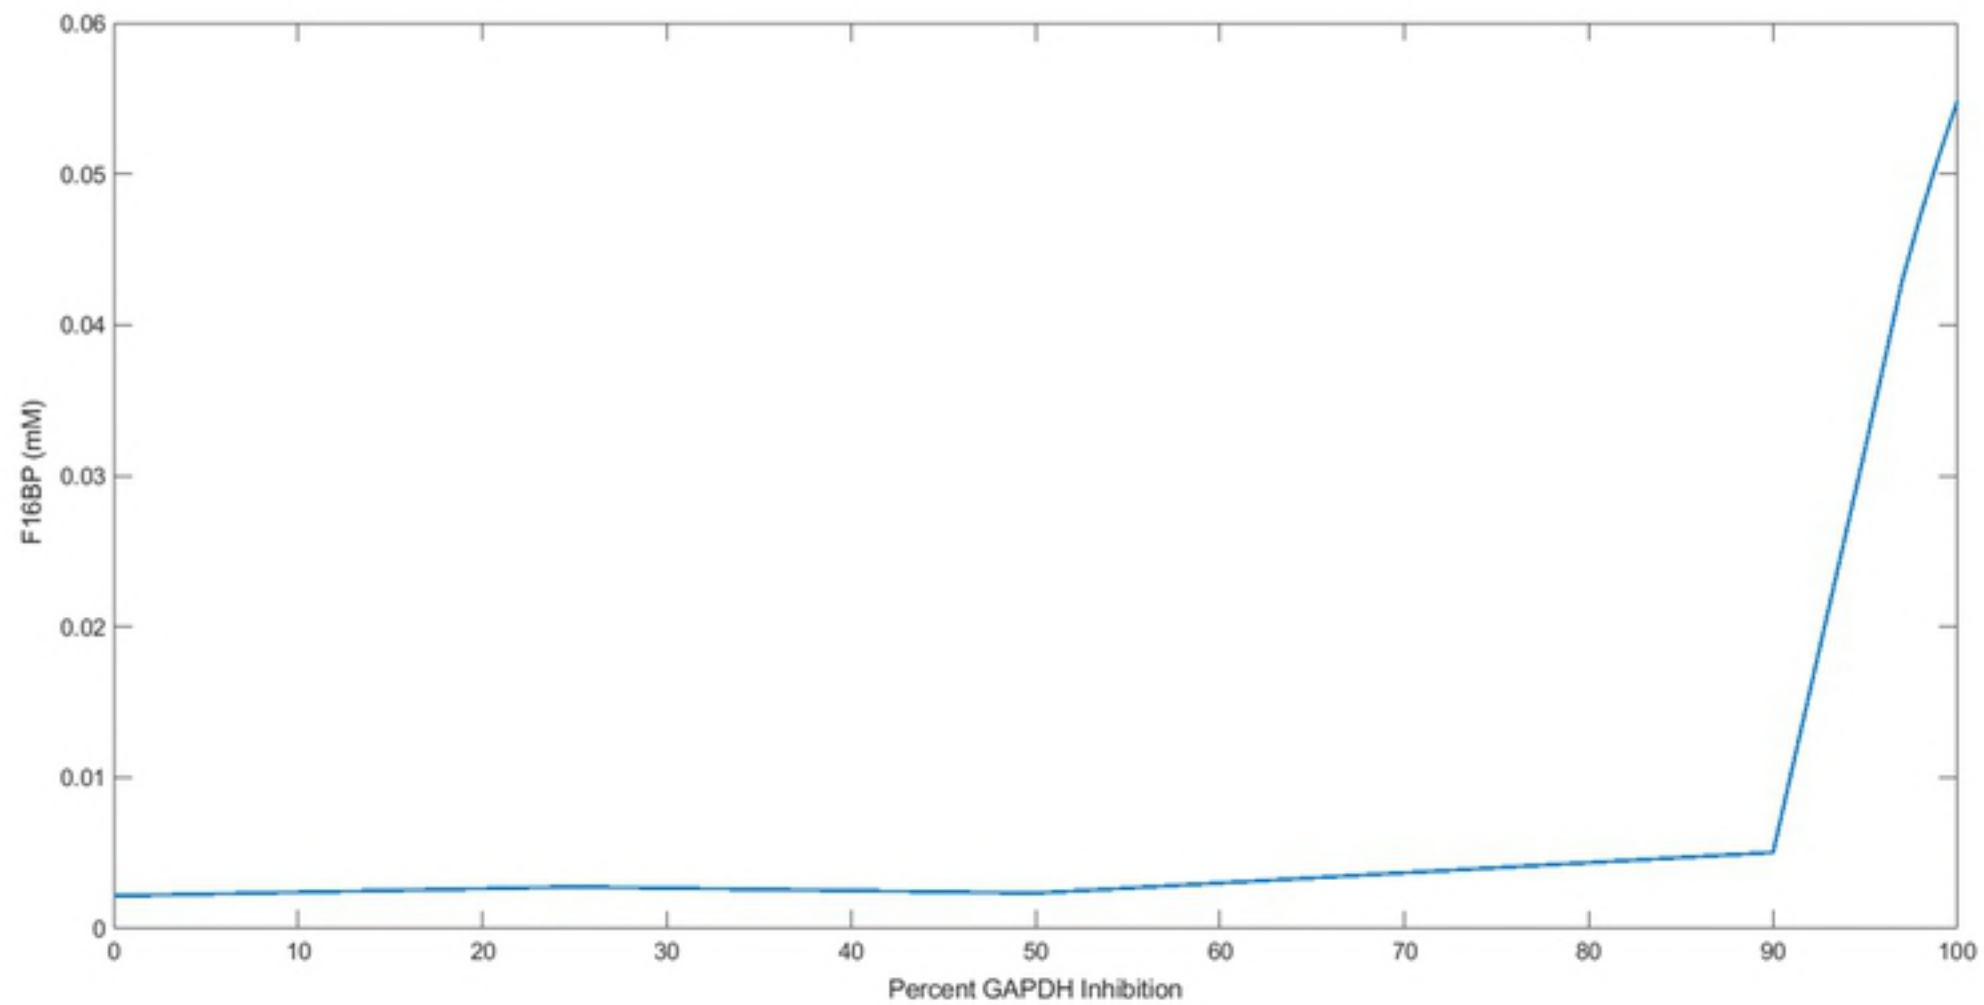

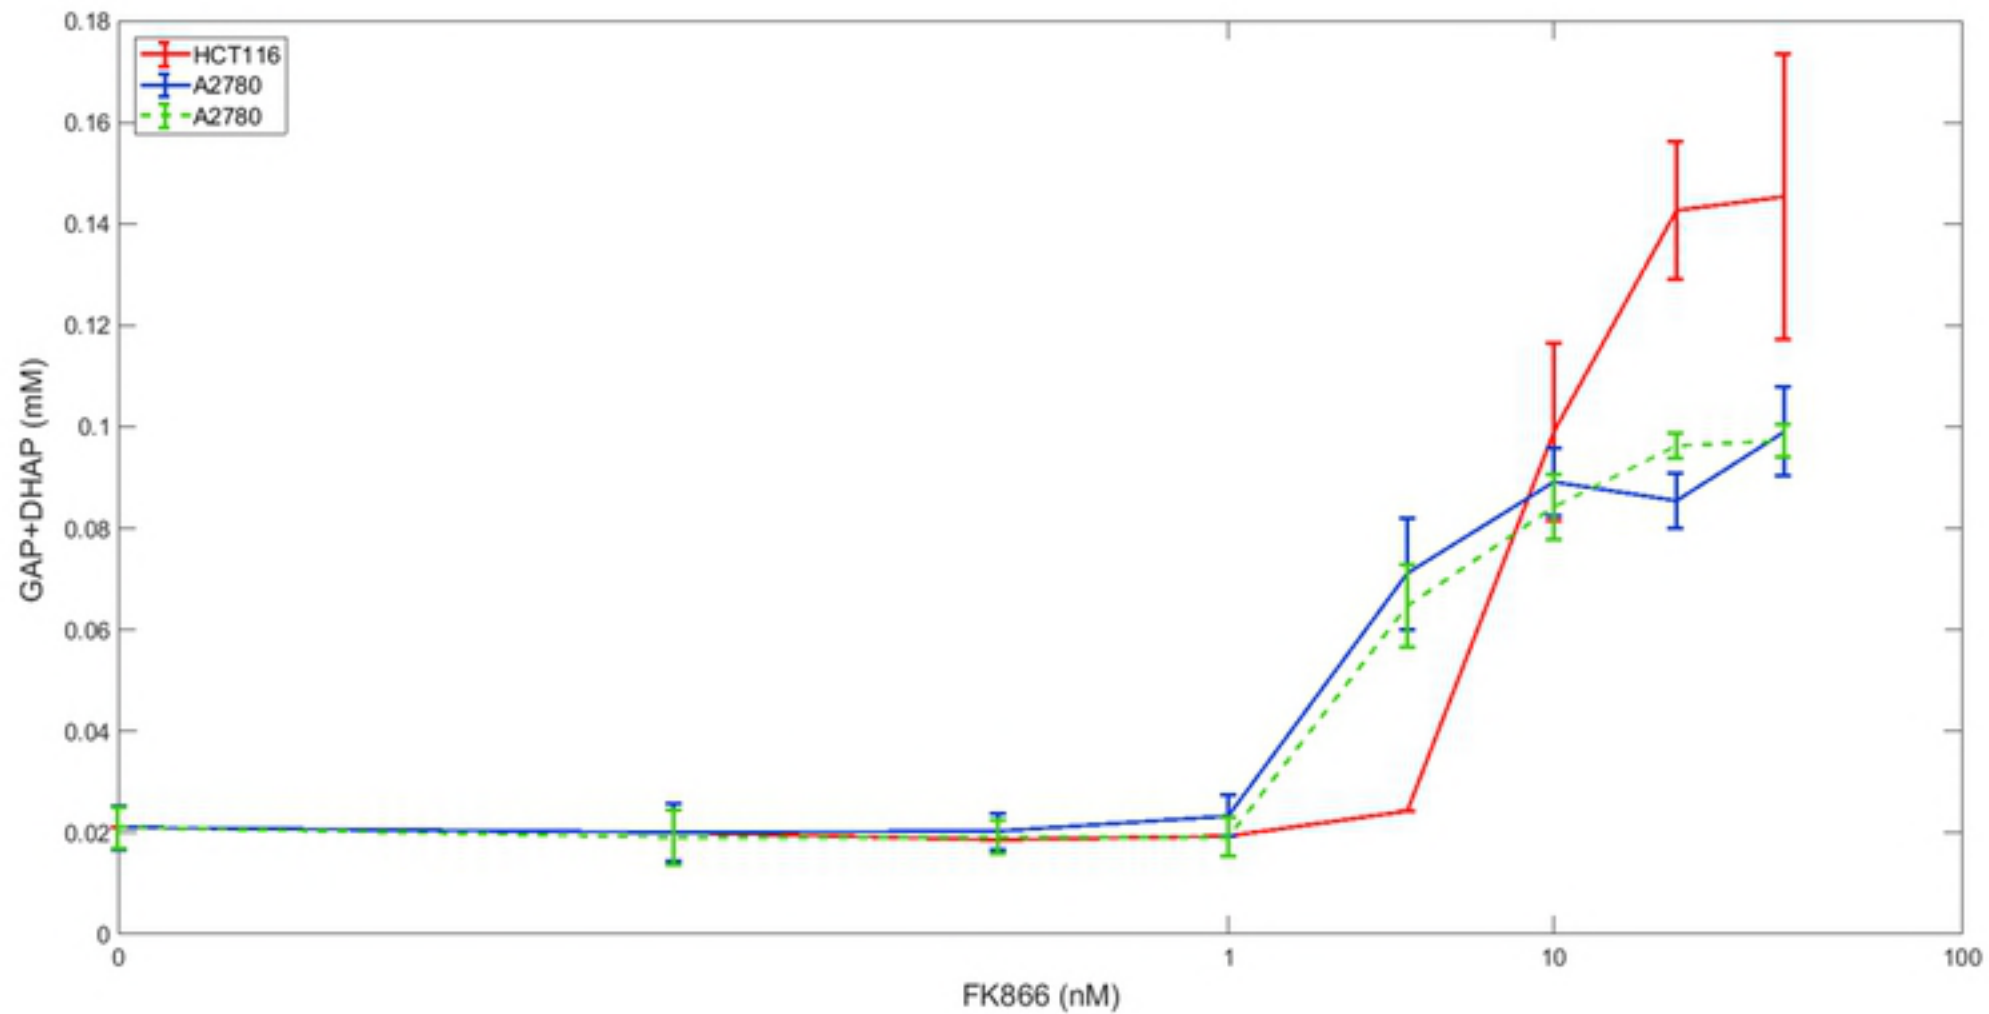

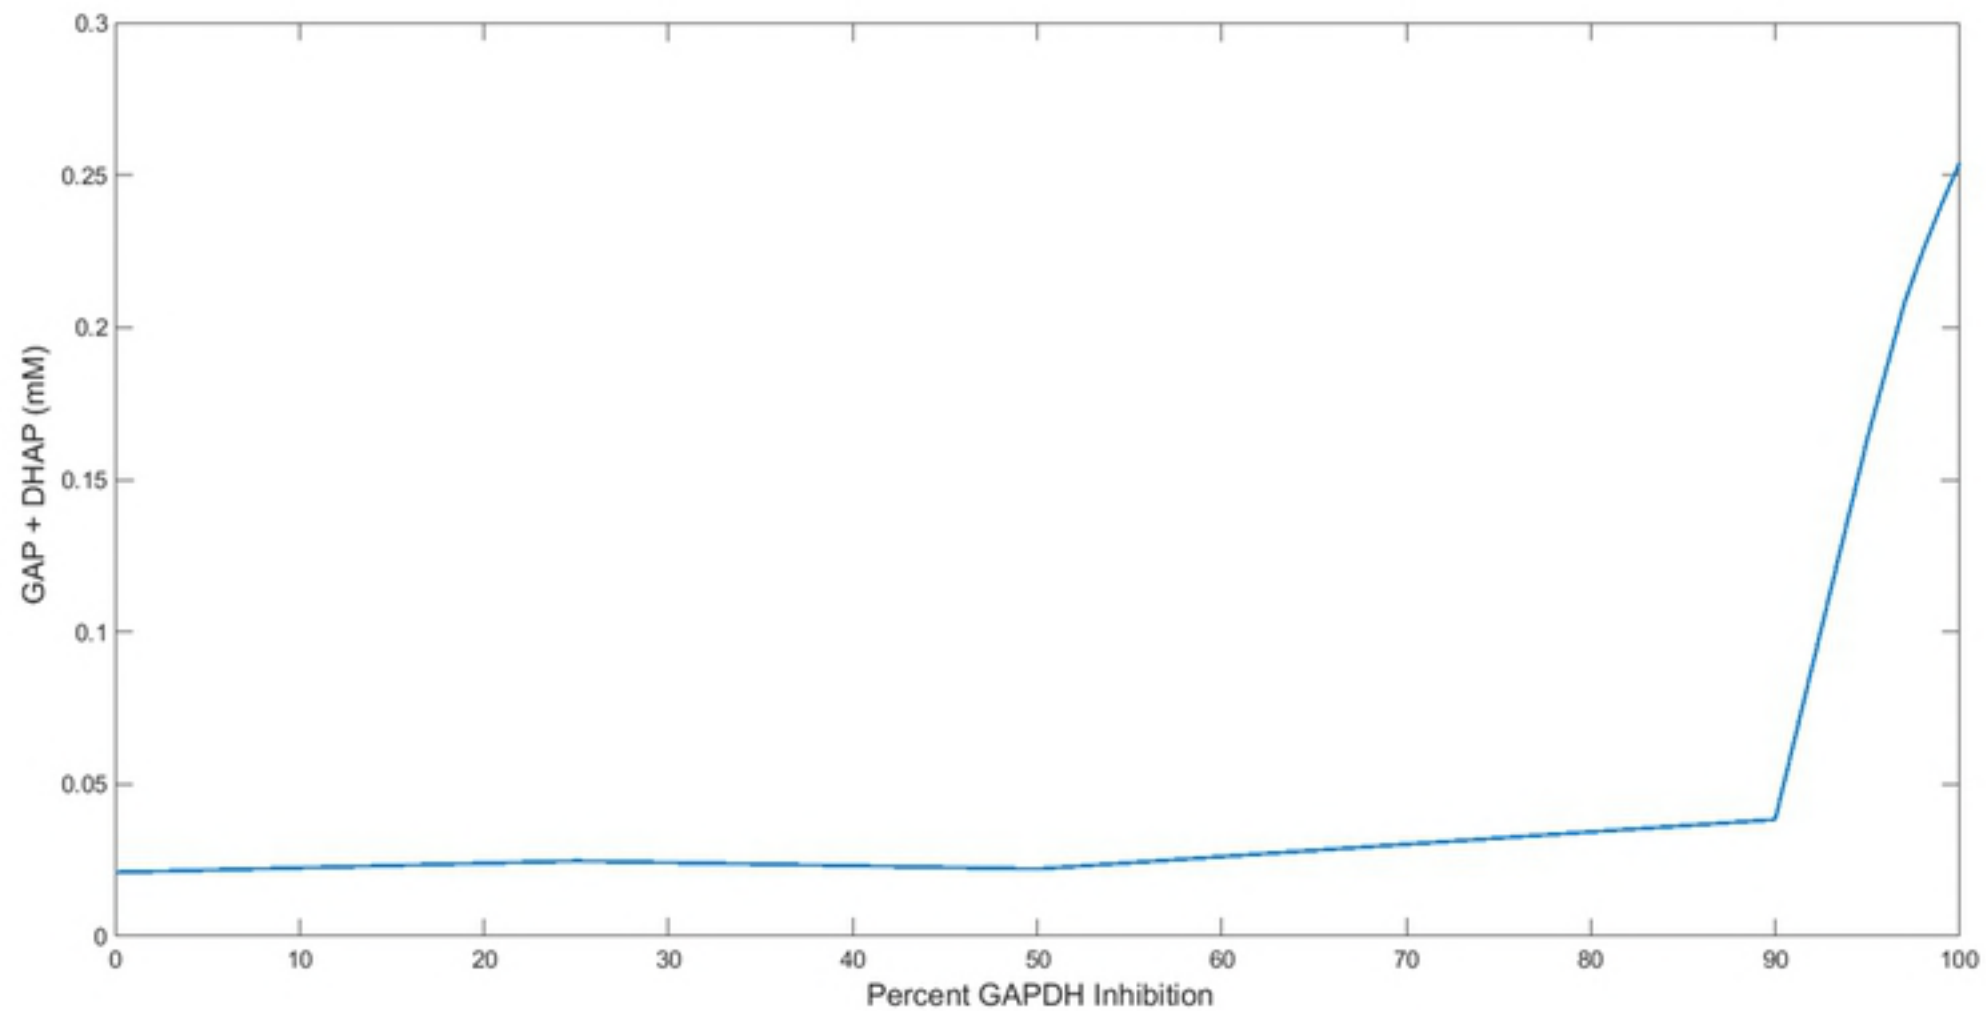

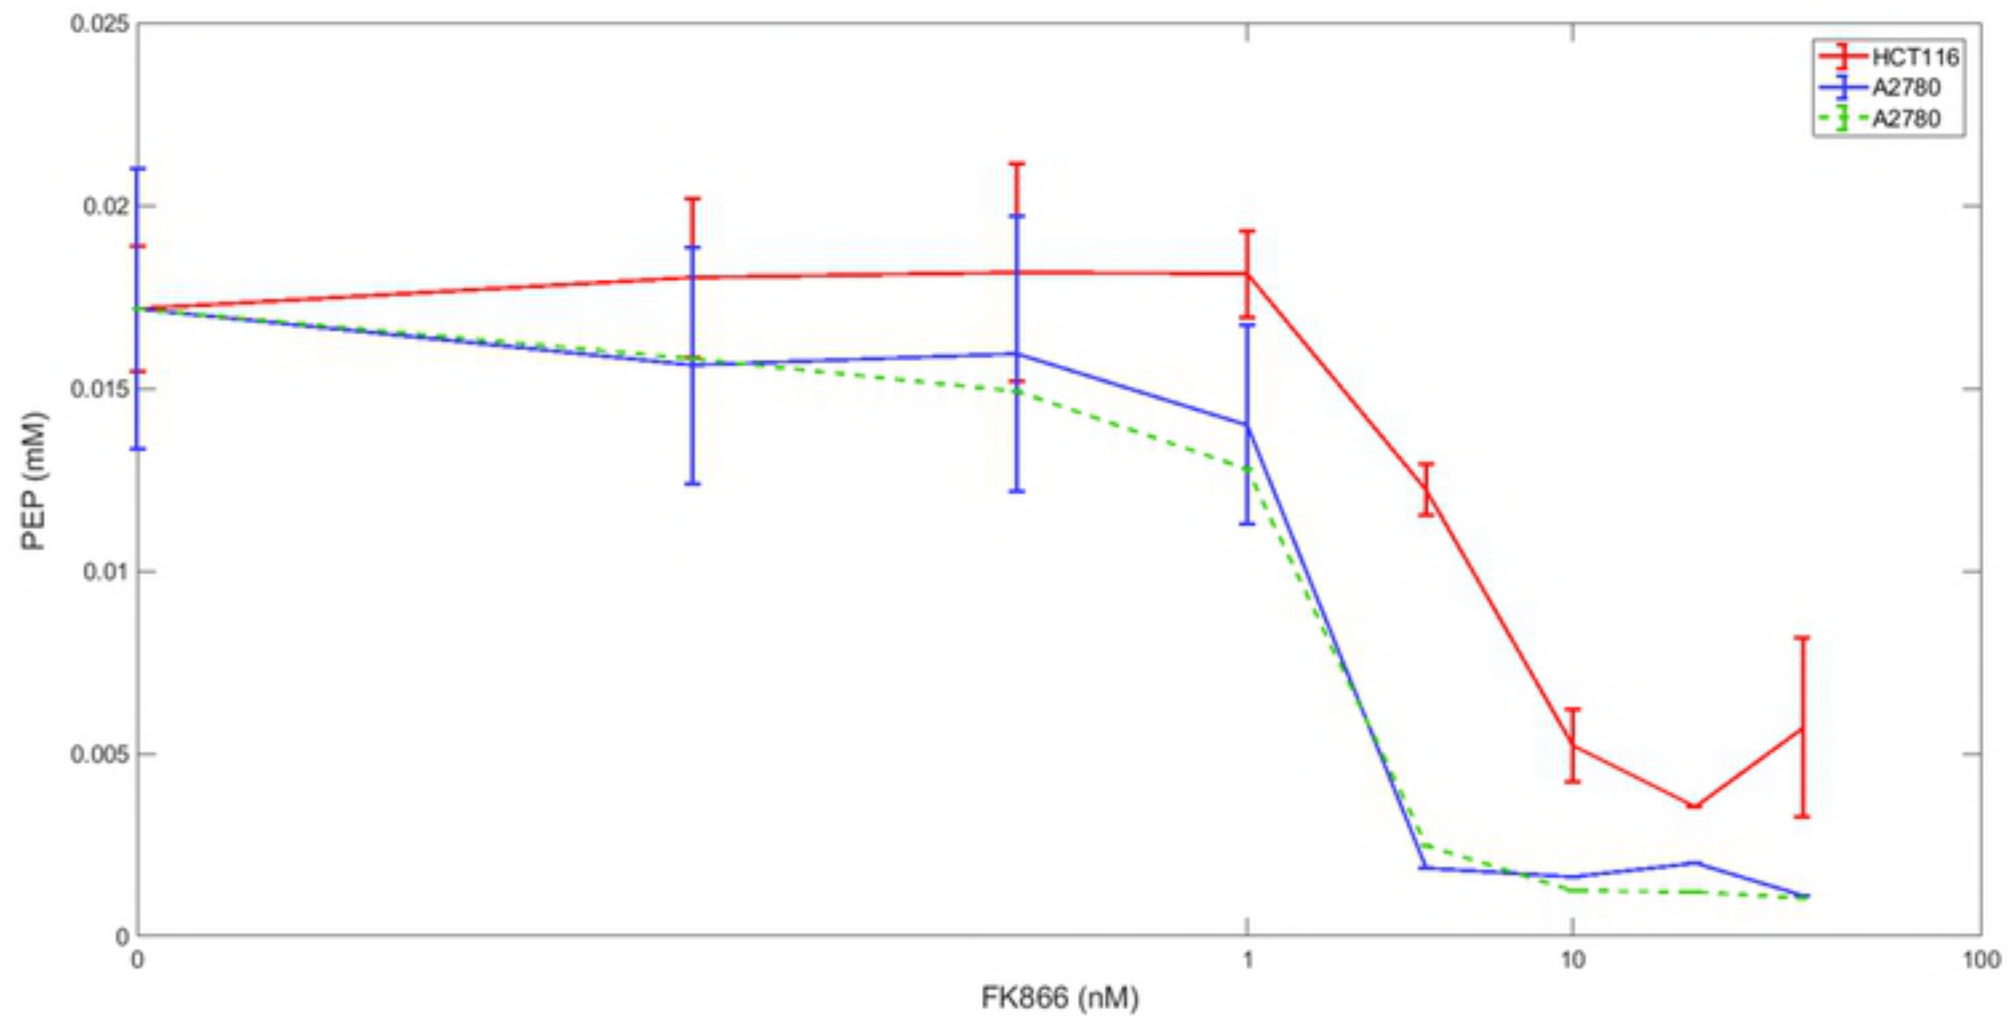

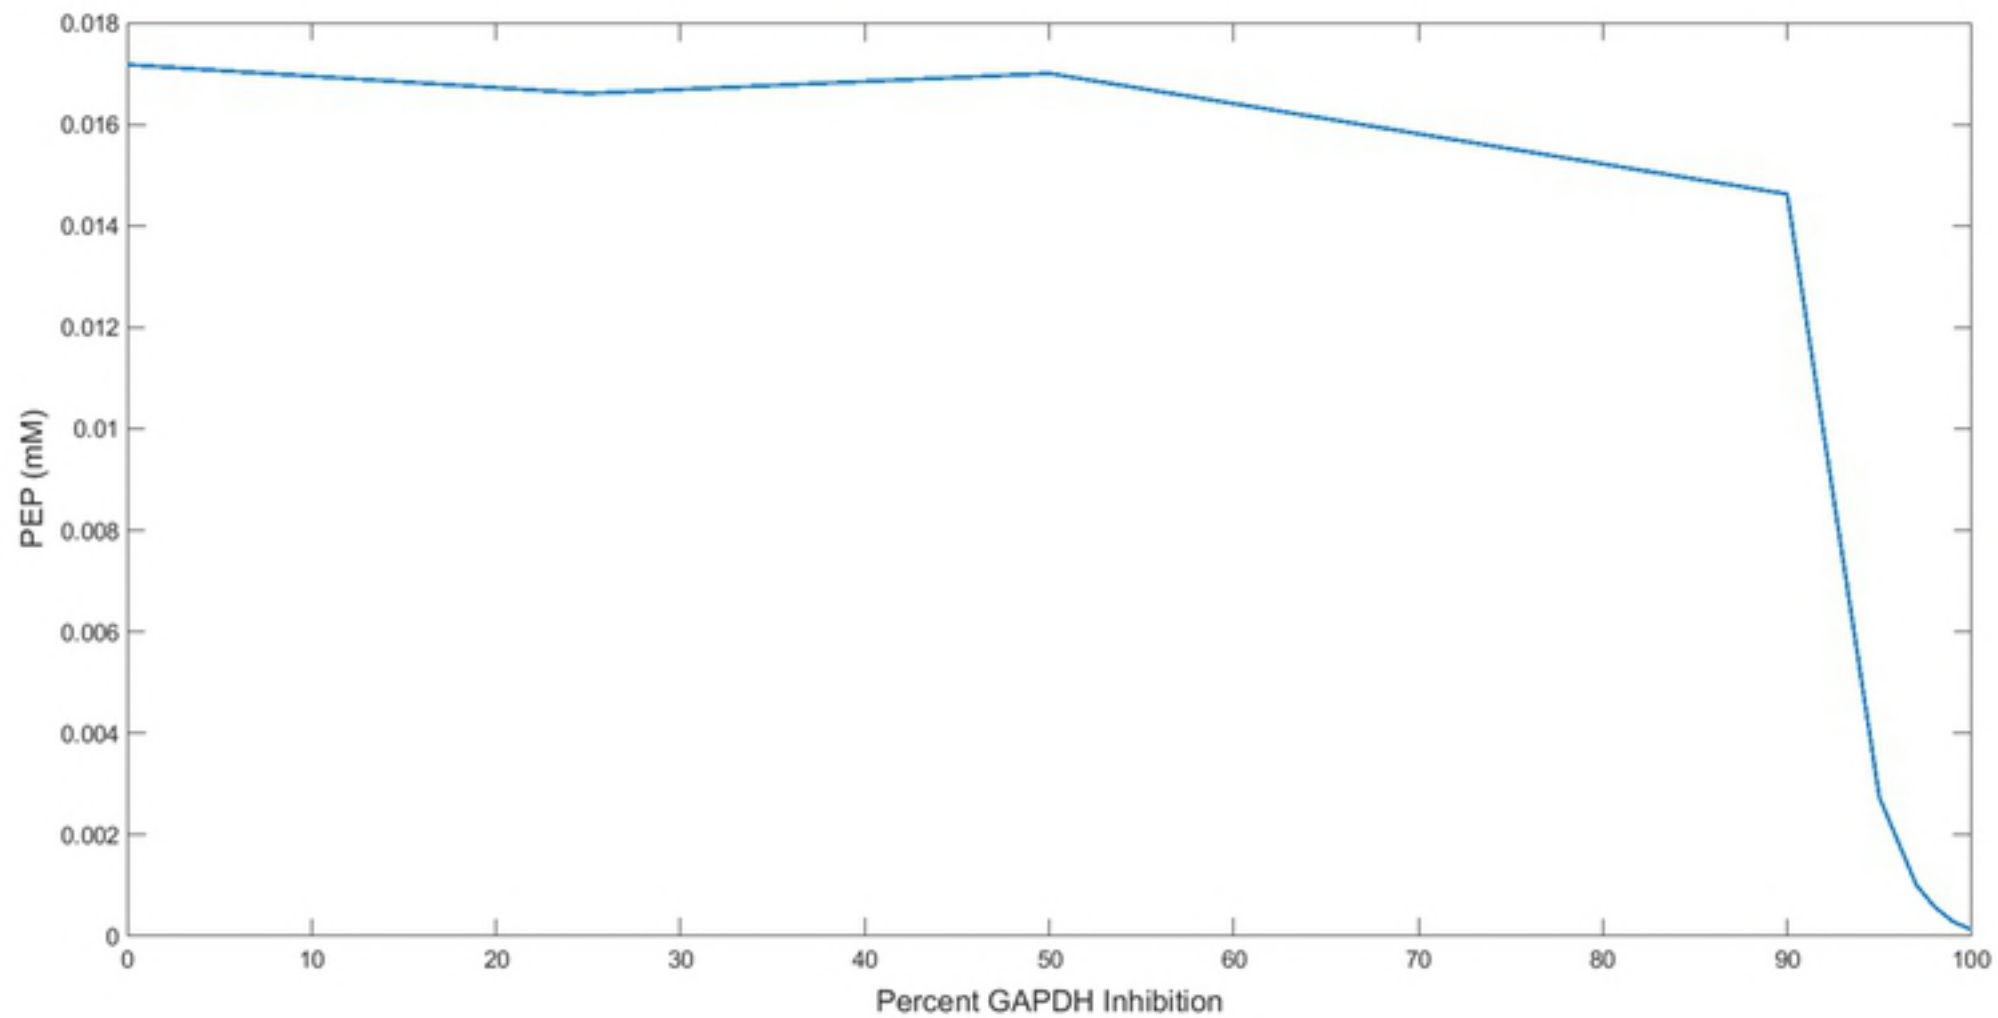

Source: https://www.biorxiv.org/content/10.1101/336677v1.full.pdf
